# Supplementary material for: Ultrasound-assisted-one-pot synthesis and antiplasmodium evaluation of 3-substituted-isoindolin-1-ones
Source: Royal Society of Chemistry journal article supplement (doi:10.1039/d3ra02829a), 2023-01-01
Supplement: d3ra02829a1.pdf [file d3ra02829a1.pdf]

## Ultrasonic-assisted-one-pot Synthesis and Antiplasmodium Evaluation of 3-Alkylisoindolin-1-ones

Muhammad Idham Darussalam Mardjan,<sup>\*a</sup> Muhamad Fadhly Hariadi,<sup>a</sup> Chessy Rima Mustika,<sup>a</sup>  
Hamzah Shiddiq Saifurofi,<sup>a</sup> Eko Sri Kunarti,<sup>a</sup> Bambang Purwono,<sup>a</sup> and Laurent Commeiras<sup>b</sup>

<sup>a</sup>Department of Chemistry, Faculty of Mathematics and Natural Sciences, Universitas Gadjah

Mada, Yogyakarta 55281, Indonesia

<sup>b</sup>Aix Marseille Univ, CNRS, Centrale Marseille, iSm2, Marseille, France

e-mail: [idham.darussalam@ugm.ac.id](mailto:idham.darussalam@ugm.ac.id), [laurent.commeiras@univ-amu.fr](mailto:laurent.commeiras@univ-amu.fr)

## General Method

All the experiments were carried out under argon atmosphere in an ultrasonic bath (Powersonic 505, 40 kHz, 350 W). The solvents for the synthesis were initially distilled from calcium hydride. The chemicals used in this study were purchased from Merck and used without any further purification. The reaction was monitored using thin layer chromatography on Merck Kieselgel 60 F254 plates and was observed under UV light (254 nm). The purification of product was carried out using column chromatography on Merck Kieselgel 60 (0.040-0.063 nm).

The melting point was determined using the electrothermal apparatus (Electrothermal 9100). The NMR spectra were recorded on JEOL JNM-ECZ500R (at 500 MHz for  $^1\text{H}$  and 125 MHz for  $^{13}\text{C}$ ). The chemical shifts were reported in parts per million (ppm) relative to the internal solvent signal of  $\text{CDCl}_3$  ( $\delta\text{H}$  7.26 ppm and  $\delta\text{C}$  77.16 pm). Multiplicity is indicated as follows: s (singlet), d (doublet), t (triplet), q (quartet), m (multiplet), ddd (doublet of doublet of doublet), dd (doublet of doublet), dt (doublet of triplet), and td (triplet of doublet). The additional NMR analysis was conducted using DEPT, COSY and HMQC. The high-resolution mass spectrometry experiments were conducted using a QSTAR Elite mass spectrometer (Applied Biosystems SCIEX) or a SYNAPT G2 HDMS mass spectrometer (Waters) equipped with an electrospray ionization source operated in the positive ion mode. The IR spectra were recorded from Shimadzu Prestige-21, where the samples were prepared as KBr pellets.

The cytotoxicity of products was evaluated using *Plasmodium falciparum* strains of 3D7 (chloroquine-sensitive) and FCR3 (chloroquine-resistant). The antiplasmodium assay was conducted using candle jar method. For the *in vitro* assay, each synthesized compound was dissolved in DMSO and was prepared in a series of concentration, i.e. 10, 5, 2.5, 1.25 and 0.625  $\mu\text{g}/\text{mL}$  in RPMI medium. A total of 100  $\mu\text{L}$  of each series of concentrations was put into the 96-well microplate with three repetition and then 100  $\mu\text{L}$  *Plasmodium* suspension was added. The culture was incubated at 37 °C for 72 h, a thin blood smear was made and treated with 20% Giemsa dyes. The percentage of parasitemia was determined by calculating the number of the infected erythrocytes for minimum 1,000 erythrocytes and then used to calculate the inhibition percentage of *P. falciparum* growth. The antiplasmodium activities were presented as mean of  $\text{IC}_{50}$  values. The  $\text{IC}_{50}$  value was calculated by probit analysis using SPSS software.

The pharmacokinetic properties including absorption, distribution, metabolism, and toxicity parameters were screened through the PreADMET web (<http://preadmet.bmdrc.org>). Moreover, the excretion parameters were determined using the pkCSM web (<https://biosig.lab.uq.edu.au/pkcsm/>).

### **General Synthesis of 3-Alkylisoindolin-1-ones (1)**

(Z)-3-benzylideneisobenzofuran-1(3H)-one derivatives **2** (0.5 mmol, 1 equiv.) and primary amines **3** (1 mmol, 2 equiv.) was dissolved in 1 mL of acetonitrile. The flask was placed in the pre-heated ultrasonic bath (50 °C) and the reaction was carried out for 30 min. The reaction mixture was placed in the ice bath, followed with the addition of NaBH<sub>3</sub>CN (314 mg, 5 mmol, 10 equiv.) and trifluoroacetic acid (0.39 mL, 5 mmol, 10 equiv.). The reaction was continued under ultrasonic irradiation at 50 °C for 60 min. The reaction was quenched with the addition of the saturated aqueous solution of NaHCO<sub>3</sub>, followed with the extraction with dichloromethane (3x5 mL). The combined organic layer was washed with brine, dried over Na<sub>2</sub>SO<sub>4</sub>, filtered and removed under vacuum. The crude product was purified by column chromatography using the eluent of *n*-hexane/ethyl acetate (9:1).

### Synthesis of 3-Benzyl-2-butylisoindolin-1-one (**1a**)

Following the procedure for the synthesis of 3-alkylisoindolin-1-ones **1** using (*Z*)-3-benzylideneisobenzofuran-1(3*H*)-one **2a** (111 mg, 0.5 mmol, 1 equiv.) and *n*-butylamine (0.099 mL, 1 mmol, 2 equiv.) with purification using column chromatography (*n*-hexane/ethyl acetate, 9:1), afforded the desired compound **1a**.

For scaled up synthesis of **1a**, the same procedure (small scale) of **1a** was conducted by using 2,22 g of (*Z*)-3-benzylideneisobenzofuran-1(3*H*)-one **2a** (10 mmol, 1 equiv.), 1,98 mL of *n*-butylamine (20 mmol, 2 equiv.), NaBH<sub>3</sub>CN (6,28 g, 100 mmol, 10 equiv.) and trifluoroacetic acid (7.6 mL, 100 mmol, 10 equiv.).

Small scale (conventional heating): white solid; yield: 107 mg (77%); mp: 89-92°C.

Small scale (ultrasound): white solid; yield: 130 mg (93%); mp: 88-91 °C.

Scaled up synthesis (ultrasound): white solid; 2.48 g (89%); mp: 89-92 °C.

IR (KBr): 3024, 2970, 2924, 2862, 1681, 1604, 1458, 1419, 1273, 1095, 702 cm<sup>-1</sup>.

<sup>1</sup>H-NMR (CDCl<sub>3</sub>, 500 MHz): δ = 7.78-7.76 (m, 1H, CH<sub>Ar</sub>), 7.40-7.36 (m, 2H, CH<sub>Ar</sub>), 7.28-7.22 (m, 3H, CH<sub>Ar</sub>), 7.09-7.07 (m, 2H, CH<sub>Ar</sub>), 6.92-6.90 (m, 1H, CH<sub>Ar</sub>), 4.80 (dd, *J* = 8 and 4.5 Hz, 1H, CH), 4.13-4.07 (m, 1H, CH<sub>2</sub>), 3.40 (dd, *J* = 14 and 4.5 Hz, 1H, CH<sub>2</sub>), 3.22 (ddd, *J* = 14, 8.5, 5.5 Hz, 1H, CH<sub>2</sub>), 2.84 (dd, *J* = 14 and 8 Hz, 1H, CH<sub>2</sub>), 1.71-1.59 (m, 2H, CH<sub>2</sub>), 1.40-1.32 (m, 2H, CH<sub>2</sub>), 0.96 (t, *J* = 7.5 Hz, 3H, CH<sub>3</sub>).

<sup>13</sup>C-NMR (CDCl<sub>3</sub>, 125 MHz): δ = 168.3 (C=O), 144.9 (C<sub>Ar</sub>), 136.1 (C<sub>Ar</sub>), 132.5 (C<sub>Ar</sub>), 130.8 (CH<sub>Ar</sub>), 129.6 (2CH<sub>Ar</sub>), 128.6 (2CH<sub>Ar</sub>), 128.2 (CH<sub>Ar</sub>), 127.1 (CH<sub>Ar</sub>), 123.6 (CH<sub>Ar</sub>), 123.0 (CH<sub>Ar</sub>), 60.0 (CH), 40.0 (CH<sub>2</sub>), 38.5 (CH<sub>2</sub>), 30.5 (CH<sub>2</sub>), 20.2 (CH<sub>2</sub>), 13.9 (CH<sub>3</sub>).

HR-MS (ESI): *m/z* [M+Na]<sup>+</sup> calcd for C<sub>19</sub>H<sub>21</sub>NONa<sup>+</sup>: 302.1515, found: 302.1517.

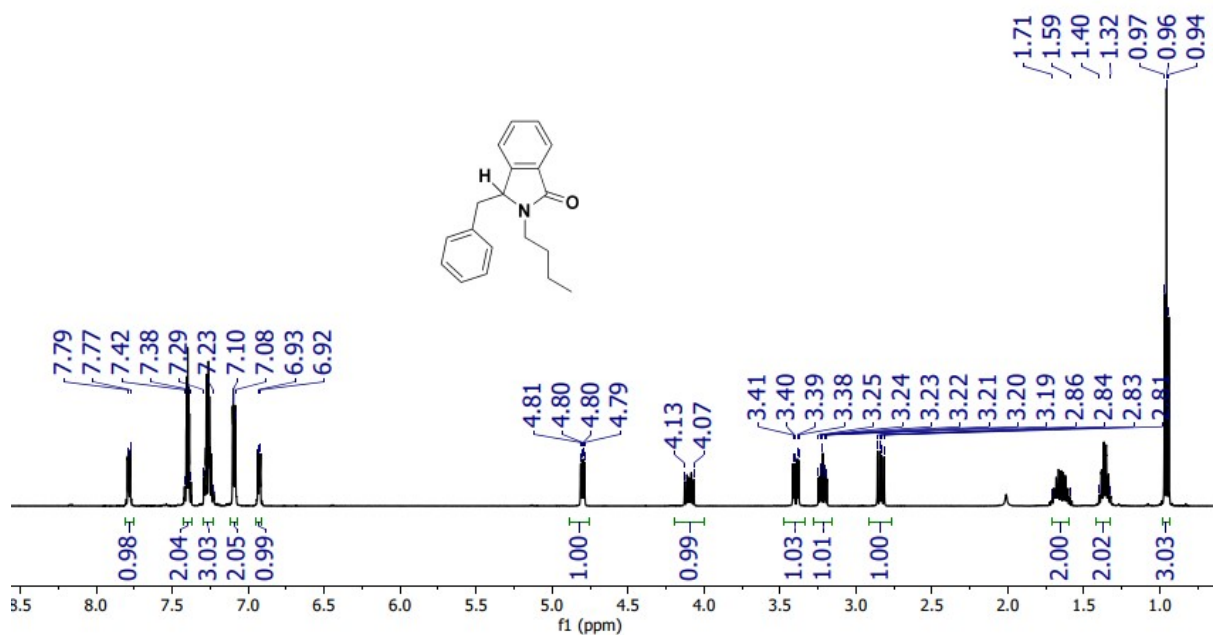

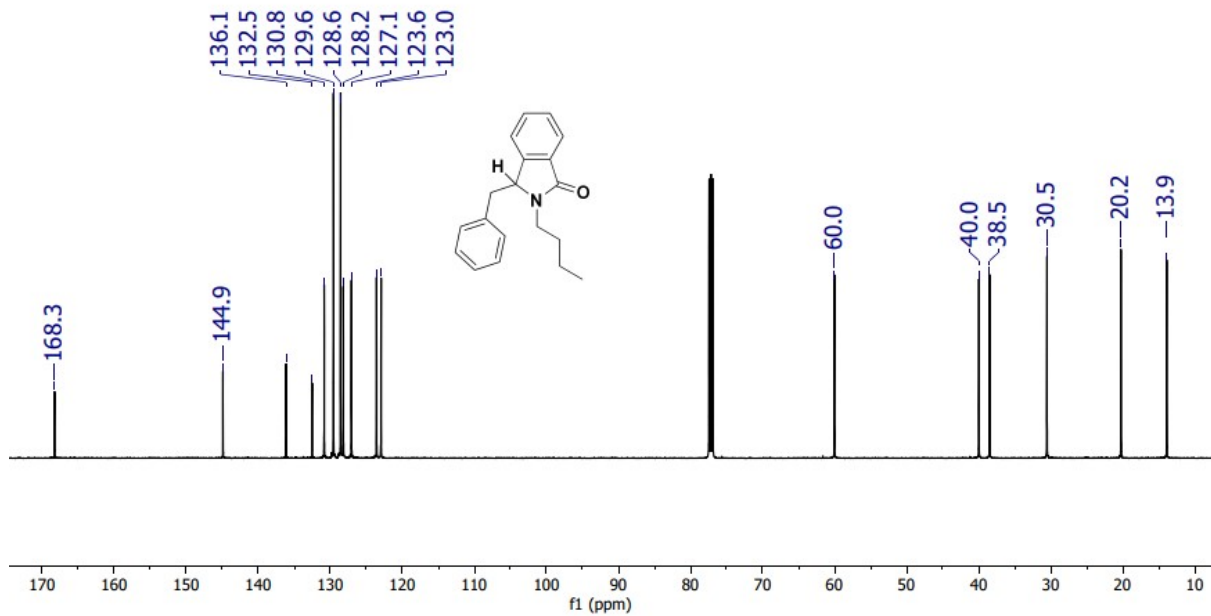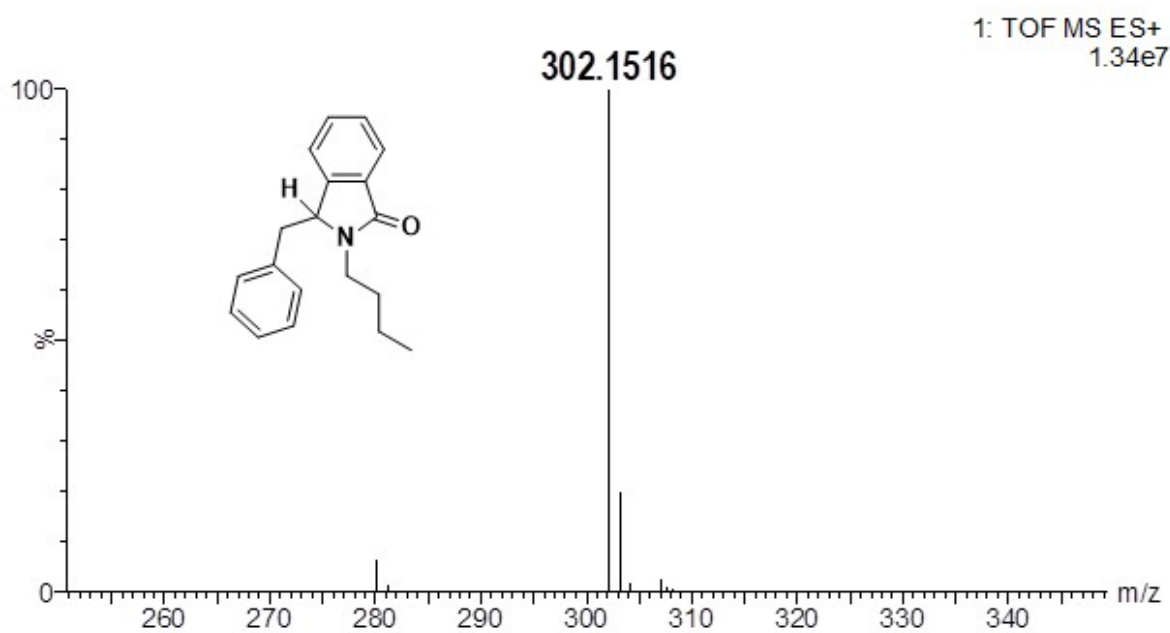

### Synthesis of 3-Benzyl-2-phenethylisoindolin-1-one (**1b**)

Following the procedure for the synthesis of 3-alkylisoindolin-1-ones **1** using (*Z*)-3-benzylideneisobenzofuran-1(3*H*)-one **2a** (111 mg, 0.5 mmol, 1 equiv.) and 2-phenethylamine (0.126 mL, 1 mmol, 2 equiv.) with purification using column chromatography (*n*-hexane/ethyl acetate, 9:1), afforded the desired compound **1b**.

Yellow oil; yield: 130 mg (79%).

IR (nujol): 3023, 2970, 2924, 2860, 1681, 1604, 1412, 1080, 756, 702 cm<sup>-1</sup>.

<sup>1</sup>H-NMR (CDCl<sub>3</sub>, 500 MHz): δ = 7.79-7.77 (m, 1H, CH<sub>Ar</sub>), 7.41-7.35 (m, 2H, CH<sub>Ar</sub>), 7.30-7.21 (m, 6H, CH<sub>Ar</sub>), 7.19-7.17 (m, 2H, CH<sub>Ar</sub>), 6.98-6.96 (m, 2H, CH<sub>Ar</sub>), 6.86-6.85 (m, 1H, CH<sub>Ar</sub>), 4.52 (dd, *J* = 7.5 and 5.0 Hz, 1H, CH), 4.33-4.27 (m, 1H, CH<sub>2</sub>), 3.44-3.34 (m, 1H, CH<sub>2</sub>), 3.25 (dd, *J* = 14.0 and 5.0 Hz, 1H, CH<sub>2</sub>), 3.01-2.90 3.44-3.34 (m, 2H, CH<sub>2</sub>), 2.76 (dd, *J* = 14.0 and 8.0 Hz, 1H, CH<sub>2</sub>).

<sup>13</sup>C-NMR (CDCl<sub>3</sub>, 125 MHz): δ = 168.4 (C=O), 145.1 (C<sub>Ar</sub>), 139.1 (C<sub>Ar</sub>), 136.2 (C<sub>Ar</sub>), 132.3 (C<sub>Ar</sub>), 131.0 (CH<sub>Ar</sub>), 129.5 (2CH<sub>Ar</sub>), 128.9 (2CH<sub>Ar</sub>), 128.8 (2CH<sub>Ar</sub>), 128.6 (2CH<sub>Ar</sub>), 128.2 (CH<sub>Ar</sub>), 127.1 (CH<sub>Ar</sub>), 126.7 (CH<sub>Ar</sub>), 123.6 (CH<sub>Ar</sub>), 122.9 (CH<sub>Ar</sub>), 60.8 (CH), 42.2 (CH<sub>2</sub>), 38.6 (CH<sub>2</sub>), 35.0 (CH<sub>2</sub>).

HR-MS (ESI): *m/z* [M+H]<sup>+</sup> calcd for C<sub>23</sub>H<sub>22</sub>NO<sup>+</sup>: 328.1696, found: 328.1693.

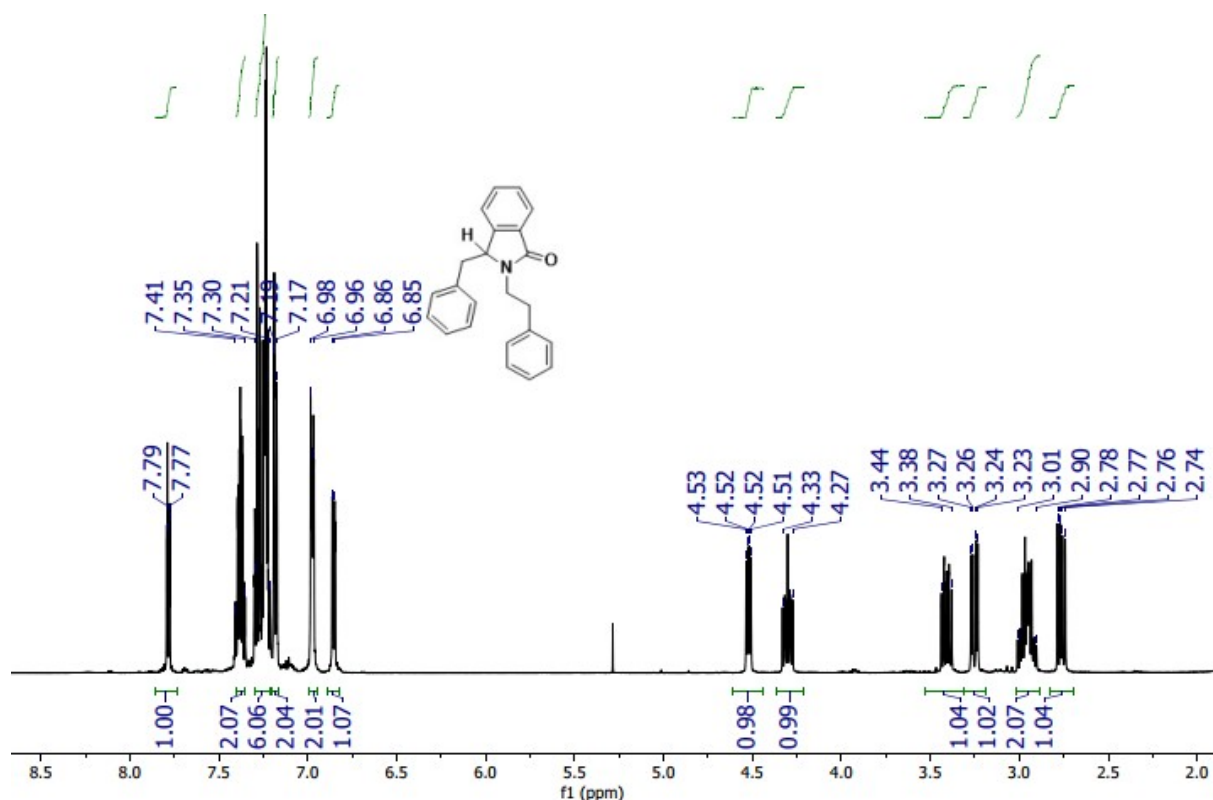

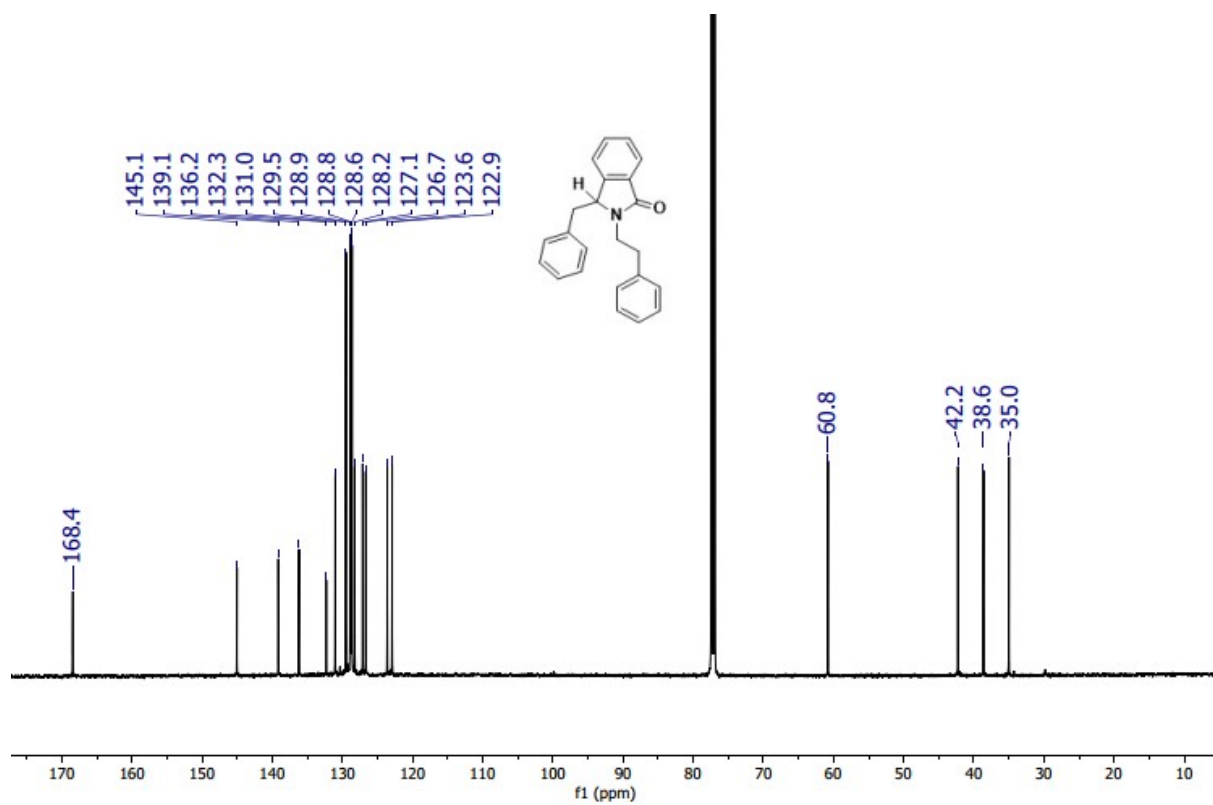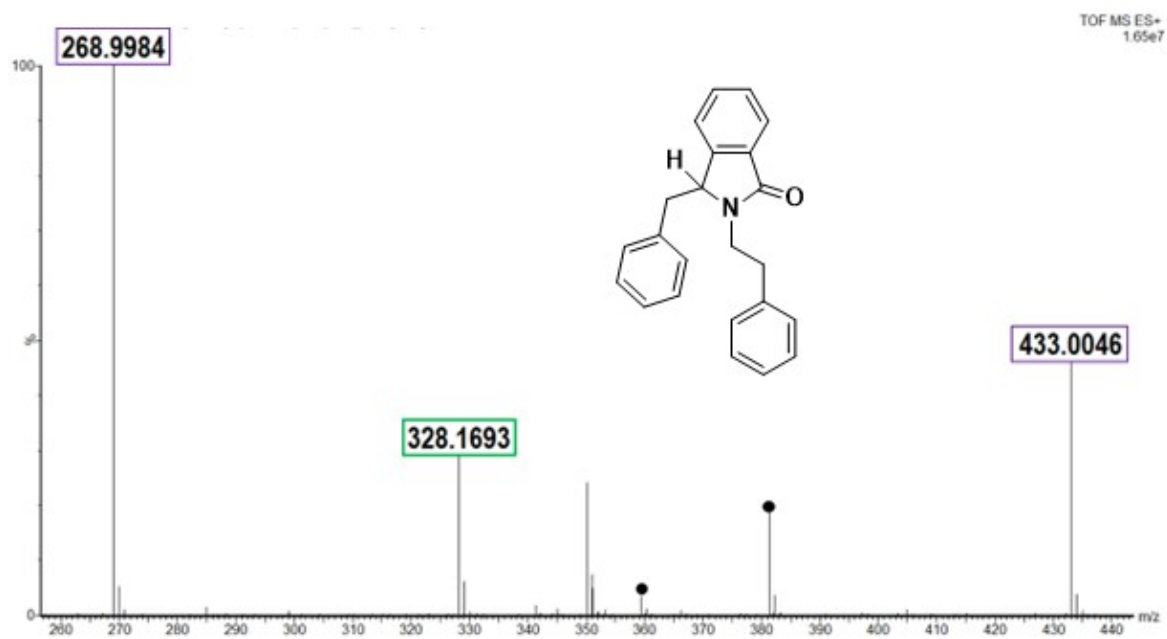

### Synthesis of 2,3-Dibenzylisoindolin-1-one (1c)

Following the procedure for the synthesis of 3-alkylisoindolin-1-ones **1** using (Z)-3-benzylideneisobenzofuran-1(3H)-one **2a** (111 mg, 0.5 mmol, 1 equiv.) and benzylamine (0.11 mL, 1 mmol, 2 equiv.) with purification using column chromatography (*n*-hexane/ethyl acetate, 9:1), afforded the desired compound **1c**.

Light yellow solid; mp: 98-101°C; yield: 121 mg (77%).

IR (KBr): 3024, 2970, 2924, 2860, 1681, 1604, 1435, 1072, 972, 694 cm<sup>-1</sup>.

<sup>1</sup>H-NMR (CDCl<sub>3</sub>, 500 MHz): δ = 7.85-7.83 (m, 1H, CH<sub>Ar</sub>), 7.43-7.37 (m, 2H, CH<sub>Ar</sub>), 7.34-7.28 (m, 3H, CH<sub>Ar</sub>), 7.25-7.21 (m, 5H, CH<sub>Ar</sub>), 7.00-6.98 (m, 2H, CH<sub>Ar</sub>), 6.87 (d, *J* = 7.5 Hz, 1H, CH<sub>Ar</sub>), 5.46 (d, *J* = 15.0 Hz, 1H, CH<sub>2</sub>), 4.57 (dd, *J* = 8.0 and 5.0 Hz, 1H, CH), 4.22 (d, *J* = 15.0 Hz, 1H, CH<sub>2</sub>), 3.37 (dd, *J* = 14.0 and 5.5 Hz, 1H, CH<sub>2</sub>), 2.83 (dd, *J* = 14.0 and 8.0 Hz, 1H, CH<sub>2</sub>).

<sup>13</sup>C-NMR (CDCl<sub>3</sub>, 125 MHz): δ = 168.6 (C=O), 145.2 (C<sub>Ar</sub>), 137.2 (C<sub>Ar</sub>), 136.2 (C<sub>Ar</sub>), 132.1 (C<sub>Ar</sub>), 131.2 (CH<sub>Ar</sub>), 129.6 (2CH<sub>Ar</sub>), 128.9 (2CH<sub>Ar</sub>), 128.7 (2CH<sub>Ar</sub>), 128.3 (CH<sub>Ar</sub>), 128.2 (2CH<sub>Ar</sub>), 127.8 (CH<sub>Ar</sub>), 127.1 (CH<sub>Ar</sub>), 123.9 (CH<sub>Ar</sub>), 123.1 (CH<sub>Ar</sub>), 59.7 (CH), 44.4 (CH<sub>2</sub>), 38.5 (CH<sub>2</sub>).

HR-MS (ESI): *m/z* [M+H]<sup>+</sup> calcd for C<sub>22</sub>H<sub>20</sub>NO<sup>+</sup>: 314.1539, found: 314.1539.

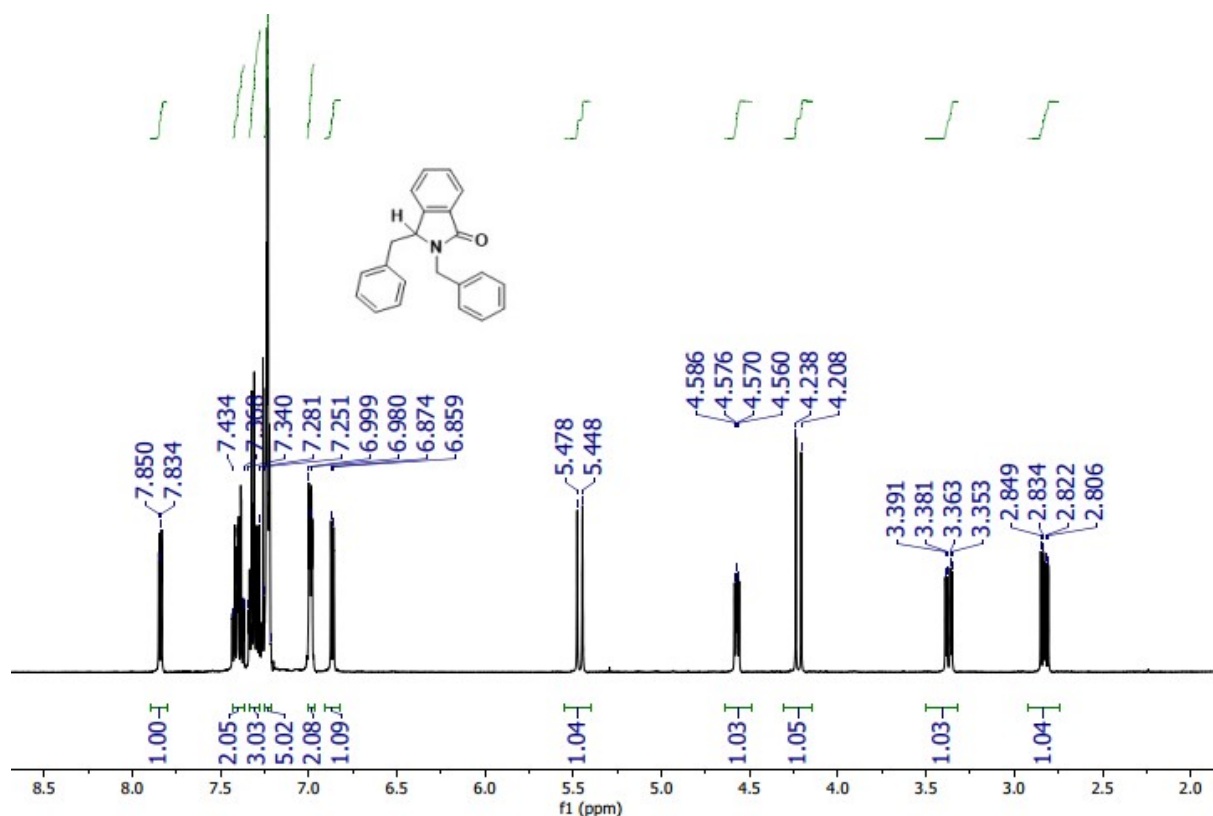



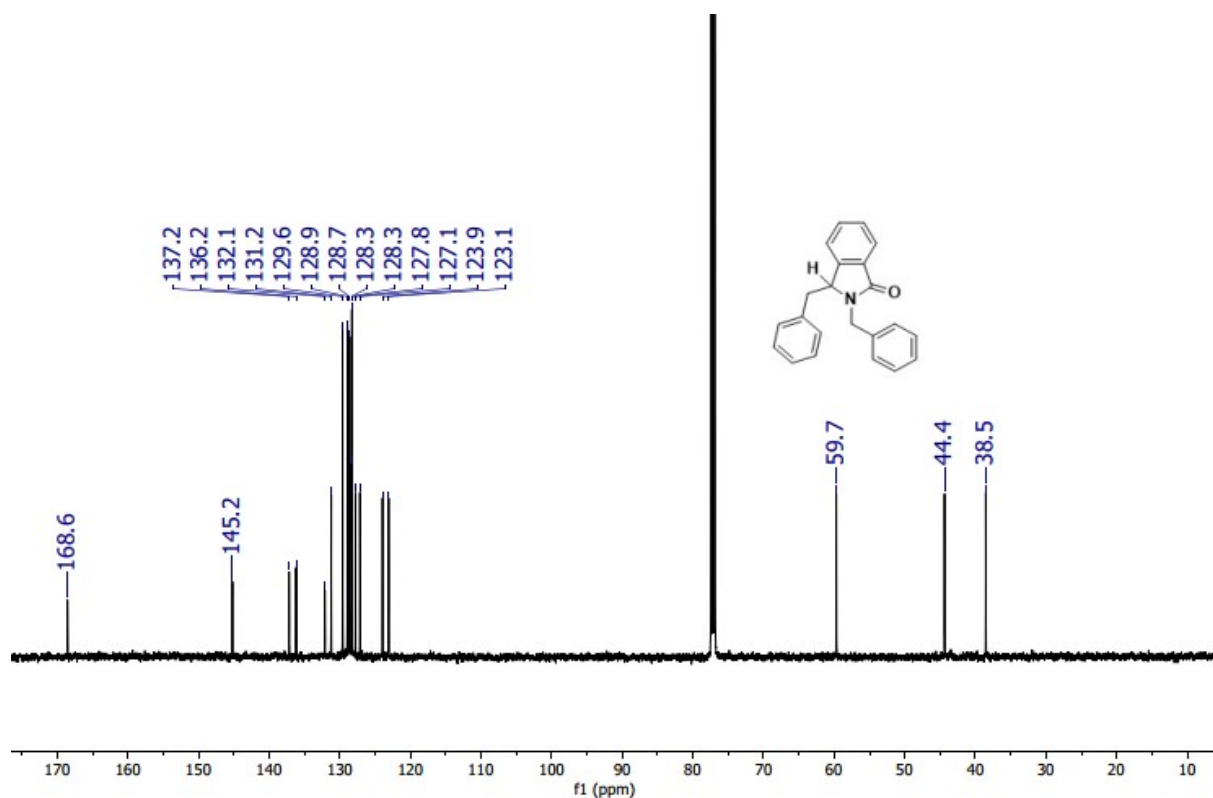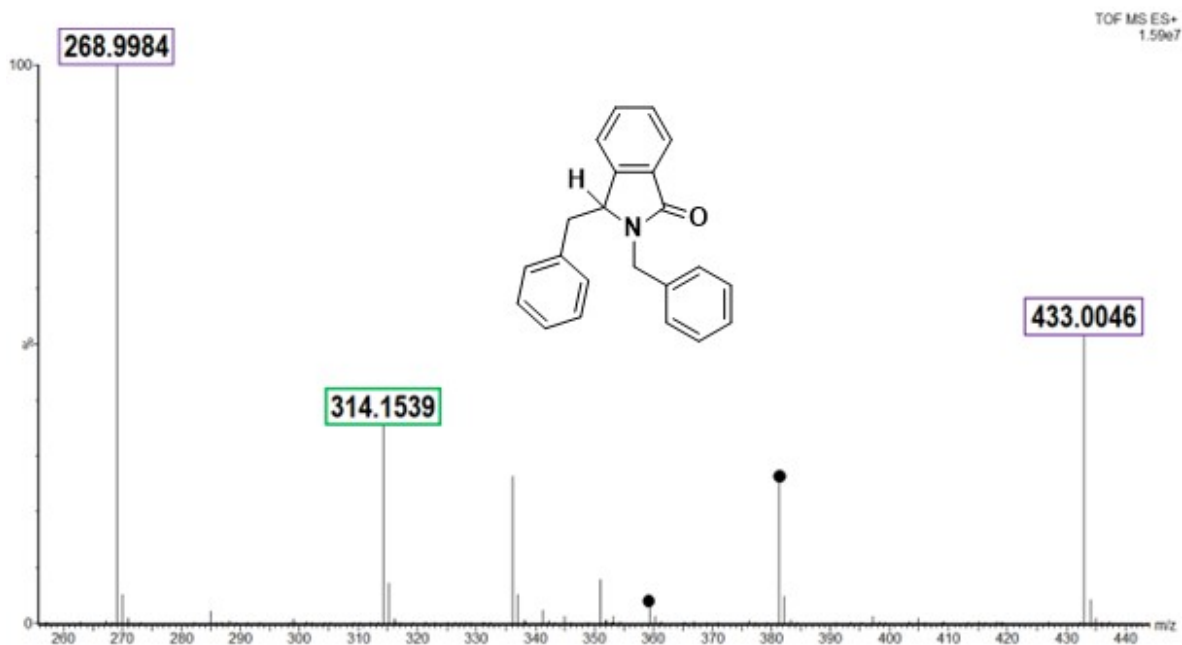

### Synthesis of 3-Benzyl-2-(4-chlorobenzyl)isoindolin-1-one (1d)

Following the procedure for the synthesis of 3-alkylisoindolin-1-ones **1** using (*Z*)-3-benzylideneisobenzofuran-1(3*H*)-one **2a** (111 mg, 0.5 mmol, 1 equiv.) and 4-chlorobenzylamine (0.122 mL, 1 mmol, 2 equiv.) with purification using column chromatography (*n*-hexane/ethyl acetate, 9:1), afforded the desired compound **1d**.

Yellow solid; mp: 108-110°C; yield: 131 mg (75%).

IR (KBr): 3020, 2975, 2925, 2860, 1680, 1603, 1404, 1072, 879, 702 cm<sup>-1</sup>.

<sup>1</sup>H-NMR (CDCl<sub>3</sub>, 500 MHz): δ = 7.85-7.83 (m, 1H, CH<sub>Ar</sub>), 7.45-7.39 (m, 2H, CH<sub>Ar</sub>), 7.31-7.24 (m, 5H, CH<sub>Ar</sub>), 7.12-7.11 (m, 2H, CH<sub>Ar</sub>), 7.02-7.00 (m, 2H, CH<sub>Ar</sub>), 6.91 (d, *J* = 8.0 Hz, 1H, CH<sub>Ar</sub>), 5.36 (d, *J* = 15.0 Hz, 1H, CH<sub>2</sub>), 4.57 (dd, *J* = 7.5 and 5.0 Hz, 1H, CH), 4.18 (d, *J* = 15.0 Hz, 1H, CH<sub>2</sub>), 3.30 (dd, *J* = 14.0 and 5.5 Hz, 1H, CH<sub>2</sub>), 2.86 (dd, *J* = 14.0 and 7.5 Hz, 1H, CH<sub>2</sub>).

<sup>13</sup>C-NMR (CDCl<sub>3</sub>, 125 MHz): δ = 168.6 (C=O), 145.2 (C<sub>Ar</sub>), 136.2 (C<sub>Ar</sub>), 135.8 (C<sub>Ar</sub>), 131.9 (C<sub>Ar</sub>), 131.4 (CH<sub>Ar</sub>), 129.7 (C<sub>Ar</sub>), 129.5<sub>9</sub> (2CH<sub>Ar</sub>), 129.5<sub>6</sub> (2CH<sub>Ar</sub>), 129.1 (2CH<sub>Ar</sub>), 128.7 (2CH<sub>Ar</sub>), 128.4 (CH<sub>Ar</sub>), 127.2 (CH<sub>Ar</sub>), 124.0 (CH<sub>Ar</sub>), 123.1 (CH<sub>Ar</sub>), 59.8 (CH), 43.8 (CH<sub>2</sub>), 38.9 (CH<sub>2</sub>).

HR-MS (ESI): *m/z* [M+H]<sup>+</sup> calcd for C<sub>22</sub>H<sub>19</sub>ClNO<sup>+</sup>: 348.1150, found: 348.1146.

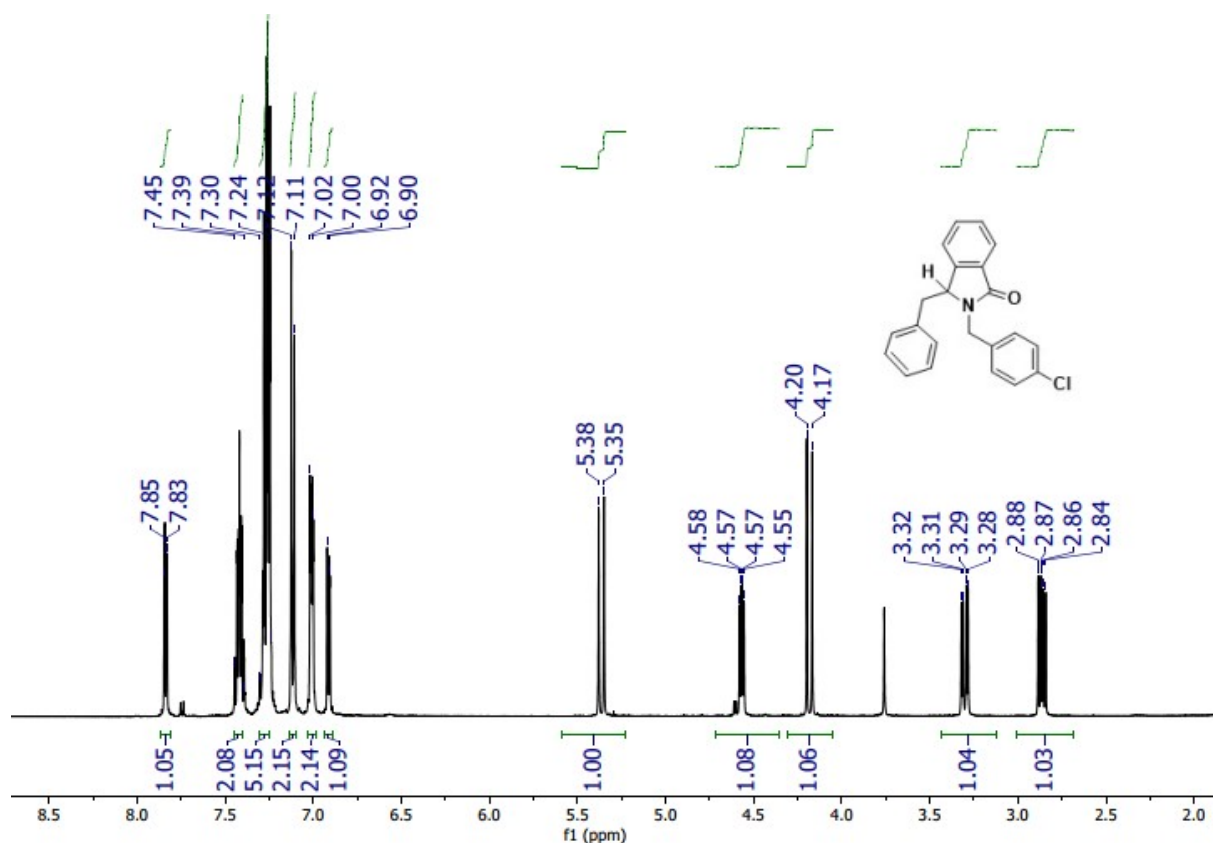

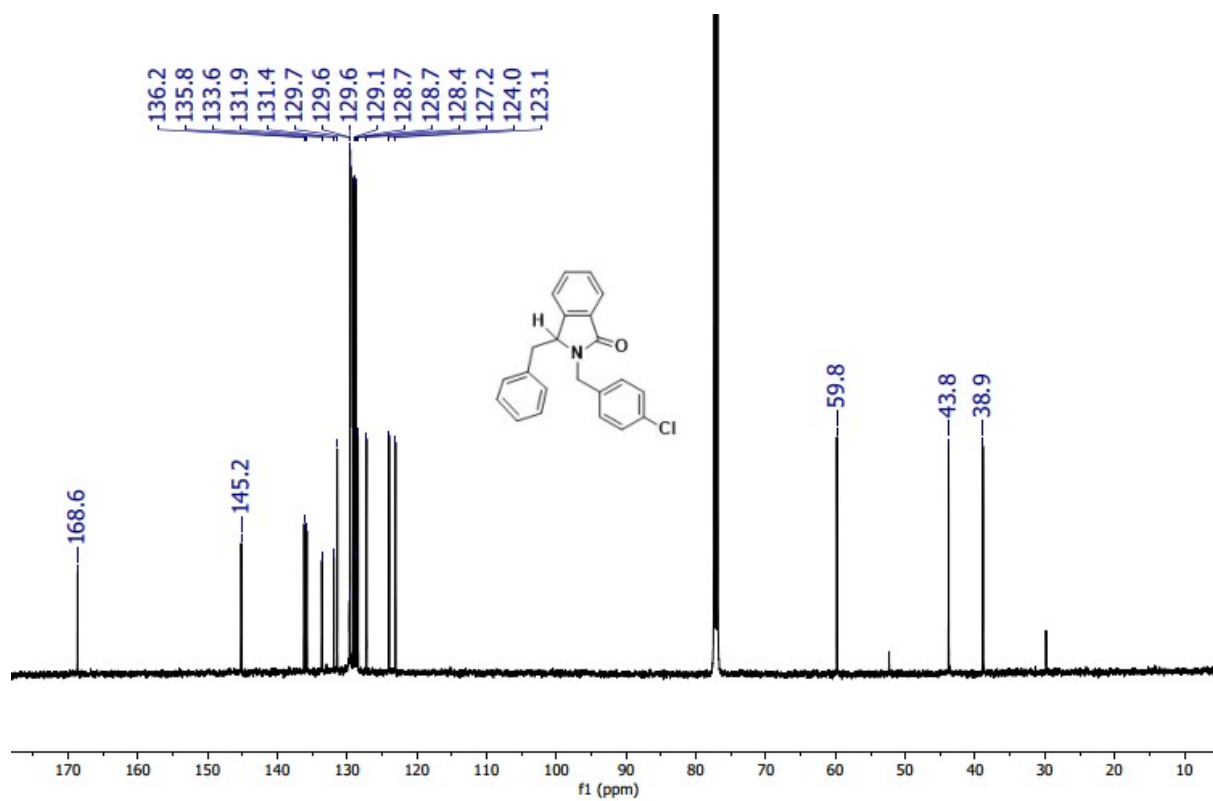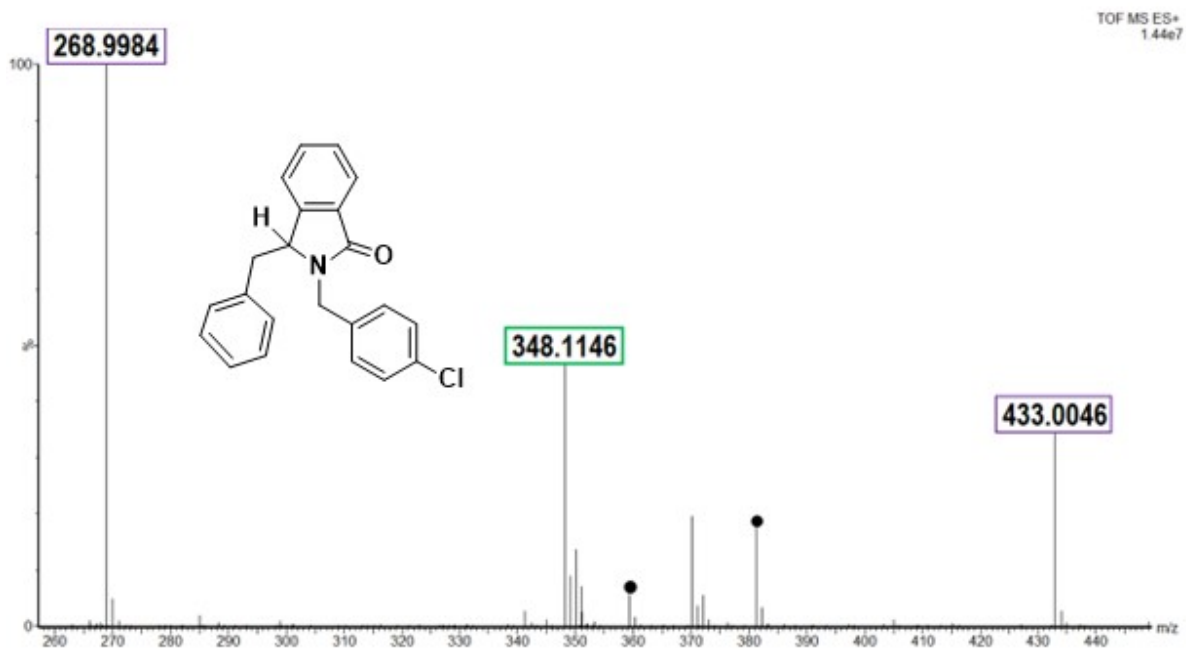

### Synthesis of 3-Benzyl-2-(4-fluorobenzyl)isoindolin-1-one (1e)

Following the procedure for the synthesis of 3-alkylisoindolin-1-ones **1** using (*Z*)-3-benzylideneisobenzofuran-1(3*H*)-one **2a** (111 mg, 0.5 mmol, 1 equiv.) and 4-fluorobenzylamine (0.114 mL, 1 mmol, 2 equiv.) with purification using column chromatography (*n*-hexane/ethyl acetate, 9:1), afforded the desired compound **1e**.

Yellow solid; mp: 108-112°C; yield: 119 mg (72%).

IR (KBr): 3024, 2975, 2924, 2865, 1682, 1603, 1404, 1219, 1072, 764, 702 cm<sup>-1</sup>.

<sup>1</sup>H-NMR (CDCl<sub>3</sub>, 500 MHz): δ = 7.85-7.83 (m, 1H, CH<sub>Ar</sub>), 7.44-7.39 (m, 2H, CH<sub>Ar</sub>), 7.28-7.23 (m, 3H, CH<sub>Ar</sub>), 7.18-7.15 (m, 2H, CH<sub>Ar</sub>), 7.02-6.98 (m, 4H, CH<sub>Ar</sub>), 6.90 (d, *J* = 8.0 Hz, 1H, CH<sub>Ar</sub>), 5.37 (d, *J* = 15.0 Hz, 1H, CH<sub>2</sub>), 4.56 (dd, *J* = 8.0 and 5.0 Hz, 1H, CH), 4.19 (d, *J* = 15.0 Hz, 1H, CH<sub>2</sub>), 3.32 (dd, *J* = 14.0 and 5.5 Hz, 1H, CH<sub>2</sub>), 2.86 (dd, *J* = 14.0 and 7.5 Hz, 1H, CH<sub>2</sub>).

<sup>13</sup>C-NMR (CDCl<sub>3</sub>, 125 MHz): δ = 168.6 (C=O), 162.4 (d, *J* = 245 Hz, C<sub>Ar</sub>), 145.2 (C<sub>Ar</sub>), 136.2 (C<sub>Ar</sub>), 133.0 (d, *J* = 3.0 Hz, C<sub>Ar</sub>), 132.0 (C<sub>Ar</sub>), 131.4 (CH<sub>Ar</sub>), 129.9 (d, *J* = 8.0 Hz, 2CH<sub>Ar</sub>), 129.6 (2CH<sub>Ar</sub>), 128.7 (2CH<sub>Ar</sub>), 128.4 (CH<sub>Ar</sub>), 127.2 (CH<sub>Ar</sub>), 124.0 (CH<sub>Ar</sub>), 123.1 (CH<sub>Ar</sub>), 115.7 (d, *J* = 21.5 Hz, 2CH<sub>Ar</sub>), 59.7 (CH), 43.7 (CH<sub>2</sub>), 38.8 (CH<sub>2</sub>).

<sup>19</sup>F-NMR (CDCl<sub>3</sub>, 470 MHz): δ = -114.7.

HR-MS (ESI): *m/z* [M+H]<sup>+</sup> calcd for C<sub>22</sub>H<sub>19</sub>FNO<sup>+</sup>: 332.1445, found: 332.1443.

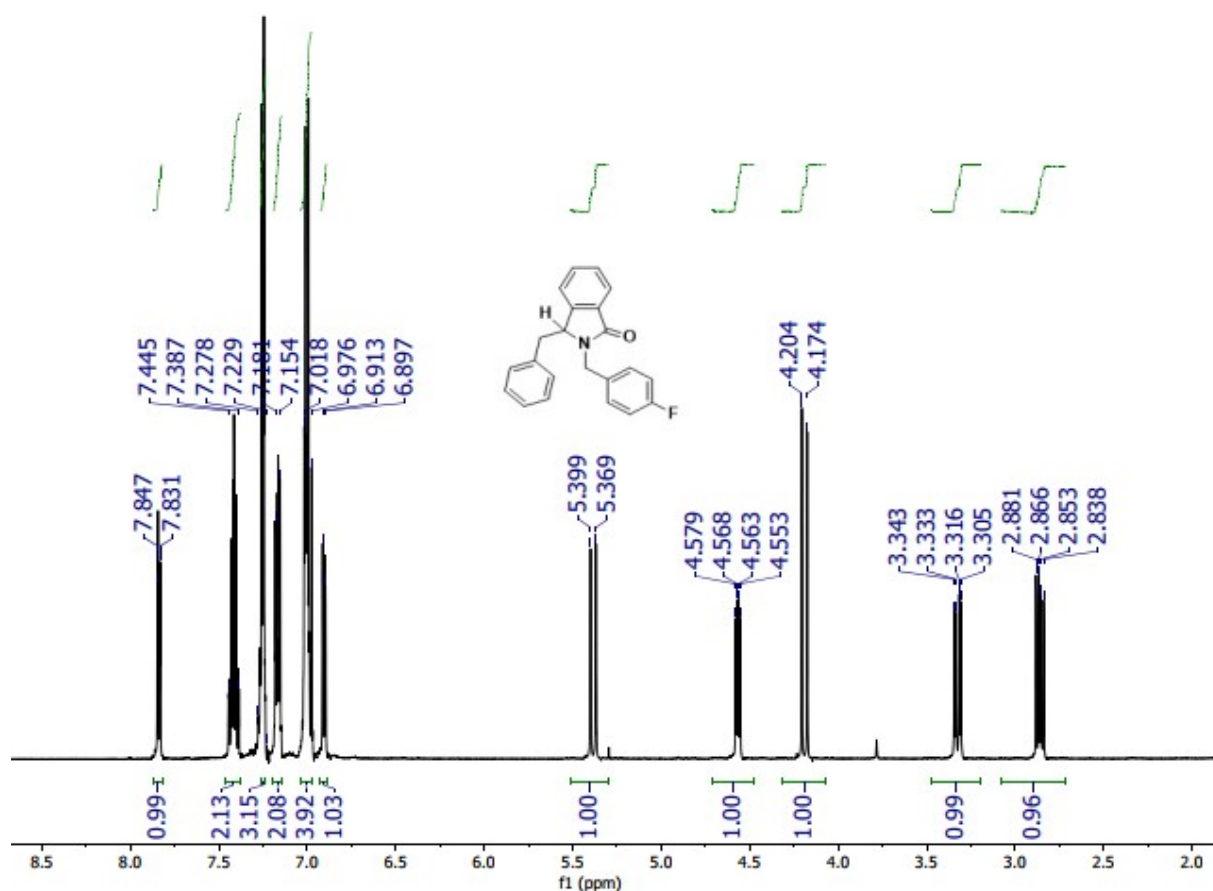

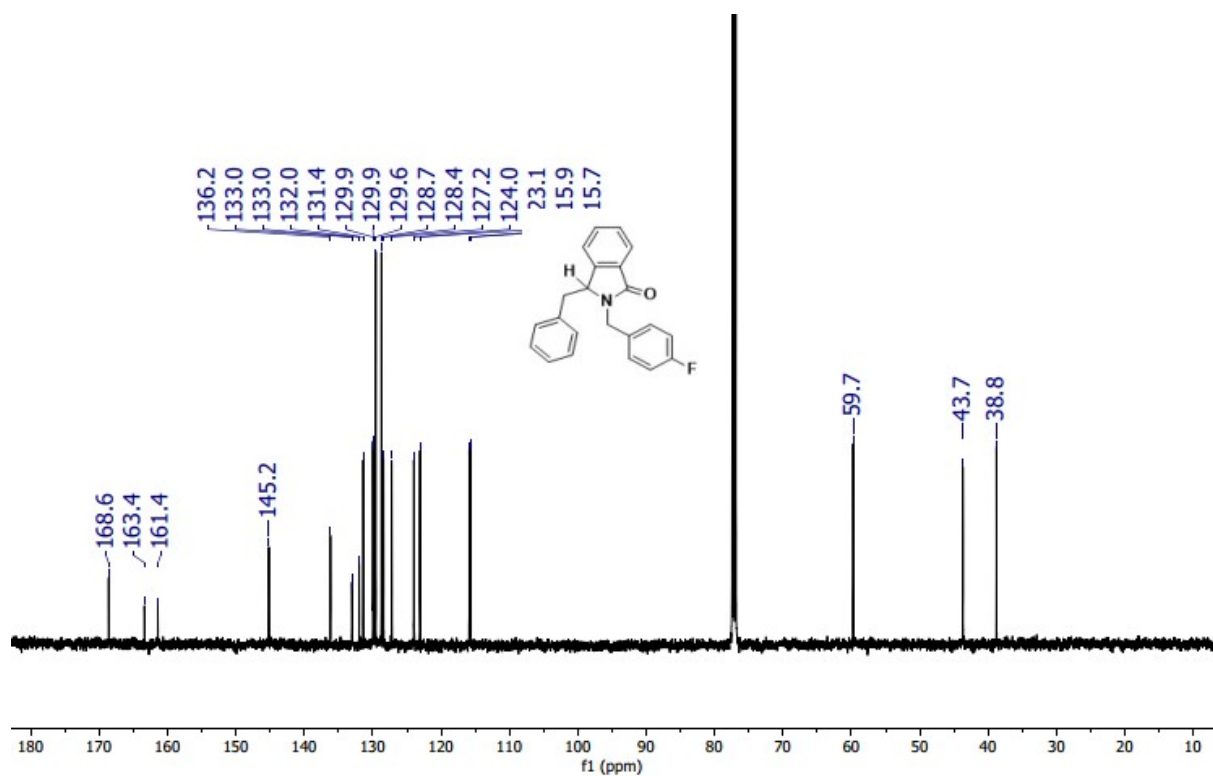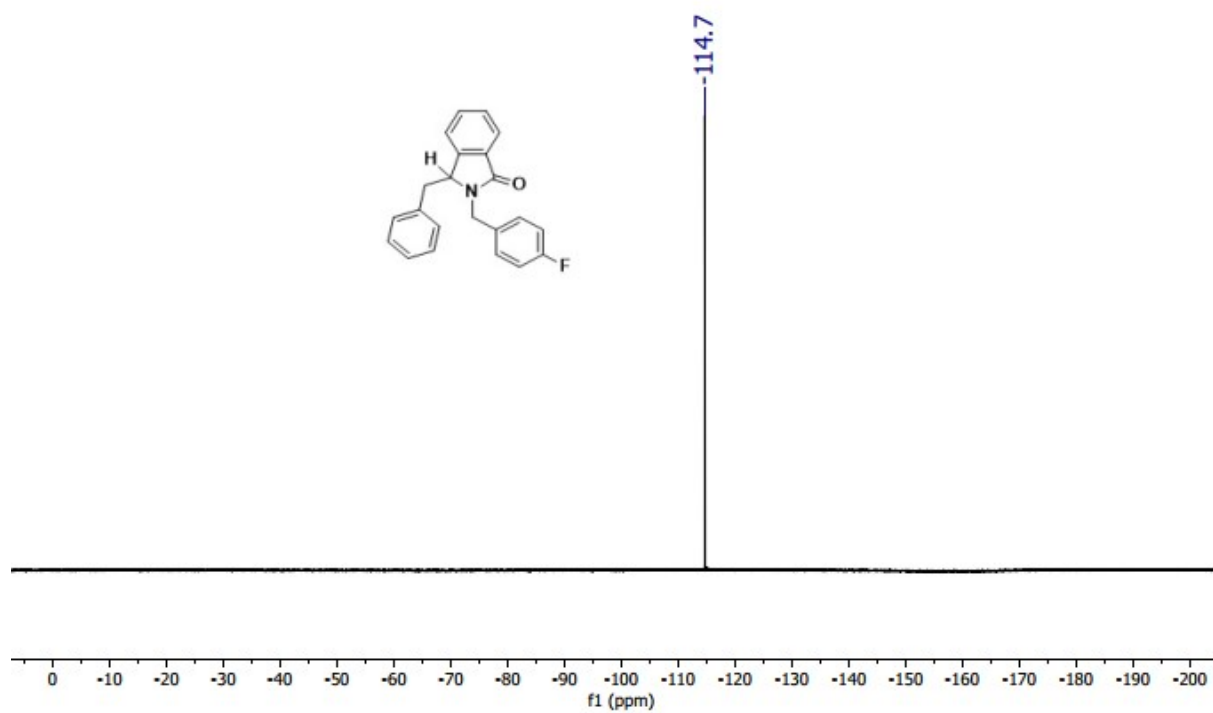

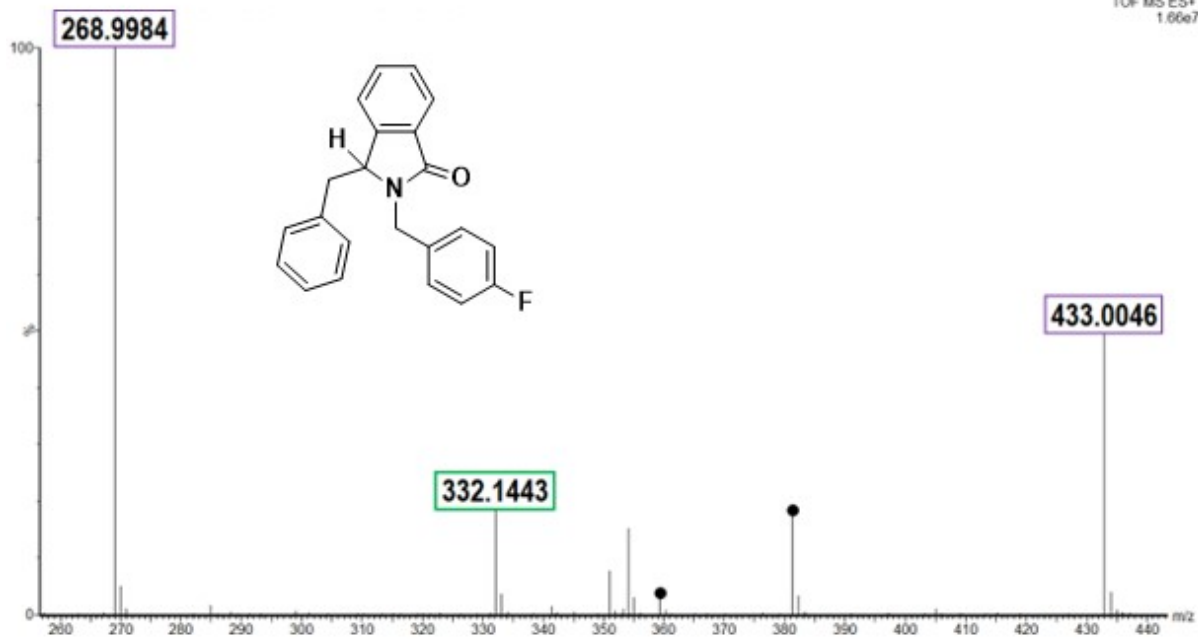

### Synthesis of 3-Benzyl-2-(4-(trifluoromethyl)benzyl)isoindolin-1-one (**1f**)

Following the procedure for the synthesis of 3-alkylisoindolin-1-ones **1** using (Z)-3-benzylideneisobenzofuran-1(3H)-one **2a** (111 mg, 0.5 mmol, 1 equiv.) and 4-(trifluoromethyl) benzylamine (0.143 mL, 1 mmol, 2 equiv.) with purification using column chromatography (*n*-hexane/ethyl acetate, 9:1), afforded the desired compound **1f**.

Yellow oil; yield: 160 mg (84%).

IR (nujol): 3022, 2974, 2924, 2860, 1683, 1404, 1217, 1072, 764, 702 cm<sup>-1</sup>.

<sup>1</sup>H-NMR (CDCl<sub>3</sub>, 500 MHz): δ = 7.87-7.85 (m, 1H, CH<sub>Ar</sub>), 7.55 (d, *J* = 8.0 Hz, 2H, CH<sub>Ar</sub>), 7.46-7.42 (m, 2H, CH<sub>Ar</sub>), 7.28-7.25 (m, 5H, CH<sub>Ar</sub>), 7.02-7.00 (m, 2H, CH<sub>Ar</sub>), 6.95-6.96 (m, 1H, CH<sub>Ar</sub>), 5.41 (d, *J* = 15.0 Hz, 1H, CH<sub>2</sub>), 4.59 (dd, *J* = 7.5 and 5.0 Hz, 1H, CH), 4.28 (d, *J* = 15.0 Hz, 1H, CH<sub>2</sub>), 3.28 (dd, *J* = 14.0 and 5.5 Hz, 1H, CH<sub>2</sub>), 2.91 (dd, *J* = 14.0 and 7.5 Hz, 1H, CH<sub>2</sub>).

<sup>13</sup>C-NMR (CDCl<sub>3</sub>, 125 MHz): δ = 168.8 (C=O), 145.2 (C<sub>Ar</sub>), 141.5 (C<sub>Ar</sub>), 136.1 (C<sub>Ar</sub>), 131.8 (C<sub>Ar</sub>), 131.6 (CH<sub>Ar</sub>), 130.1 (q, *J* = 32.5 Hz, C<sub>Ar</sub>), 129.5 (2CH<sub>Ar</sub>), 128.8 (2CH<sub>Ar</sub>), 128.5 (CH<sub>Ar</sub>), 128.4 (2CH<sub>Ar</sub>), 127.4 (CH<sub>Ar</sub>), 125.9 (CH<sub>Ar</sub>), 125.8 (CH<sub>Ar</sub>), 124.1 (CH<sub>Ar</sub>), 123.1 (CH<sub>Ar</sub>), 122.1 (q, *J* = 270.0 Hz, CF<sub>3</sub>), 60.0 (CH), 44.1 (CH<sub>2</sub>), 39.0 (CH<sub>2</sub>).

<sup>19</sup>F-NMR (CDCl<sub>3</sub>, 470 MHz): δ = -62.5.

HR-MS (ESI): *m/z* [M+H]<sup>+</sup> calcd for C<sub>23</sub>H<sub>19</sub>F<sub>3</sub>NO<sup>+</sup>: 382.1413, found: 382.1415.

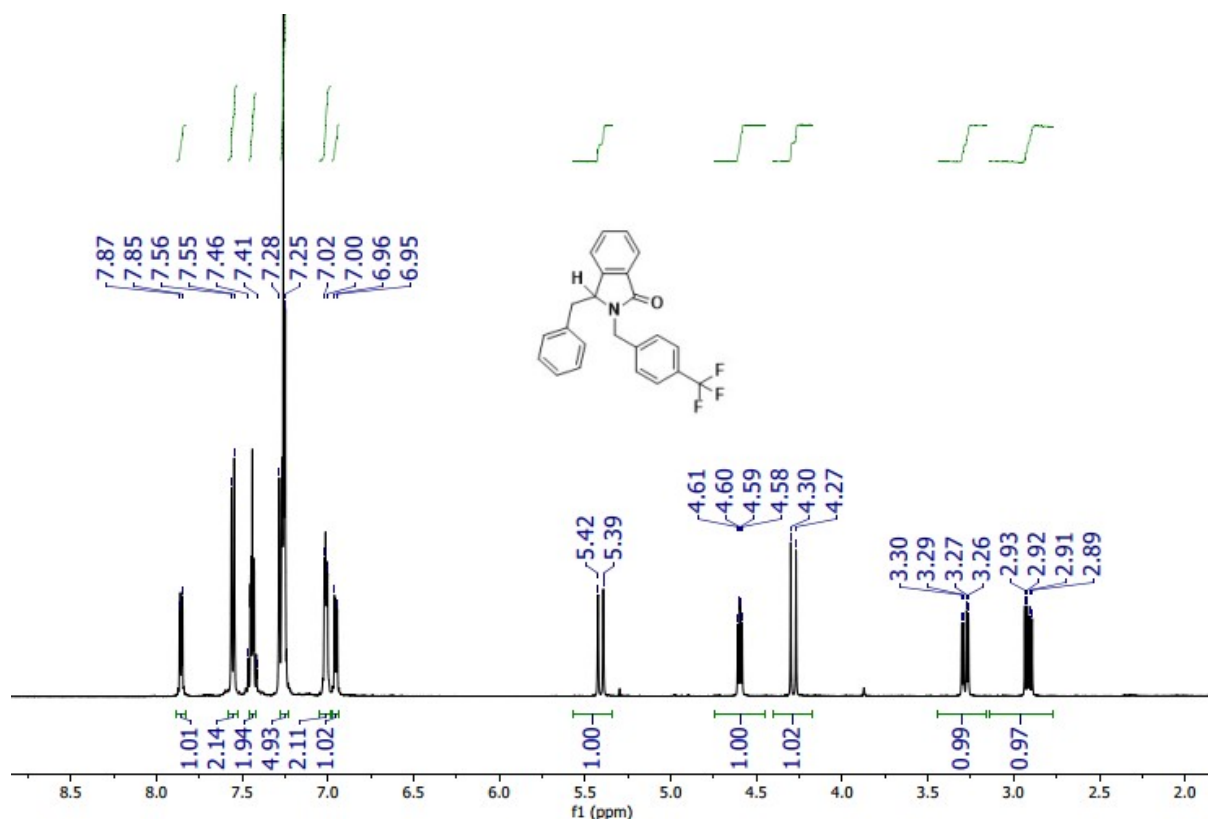

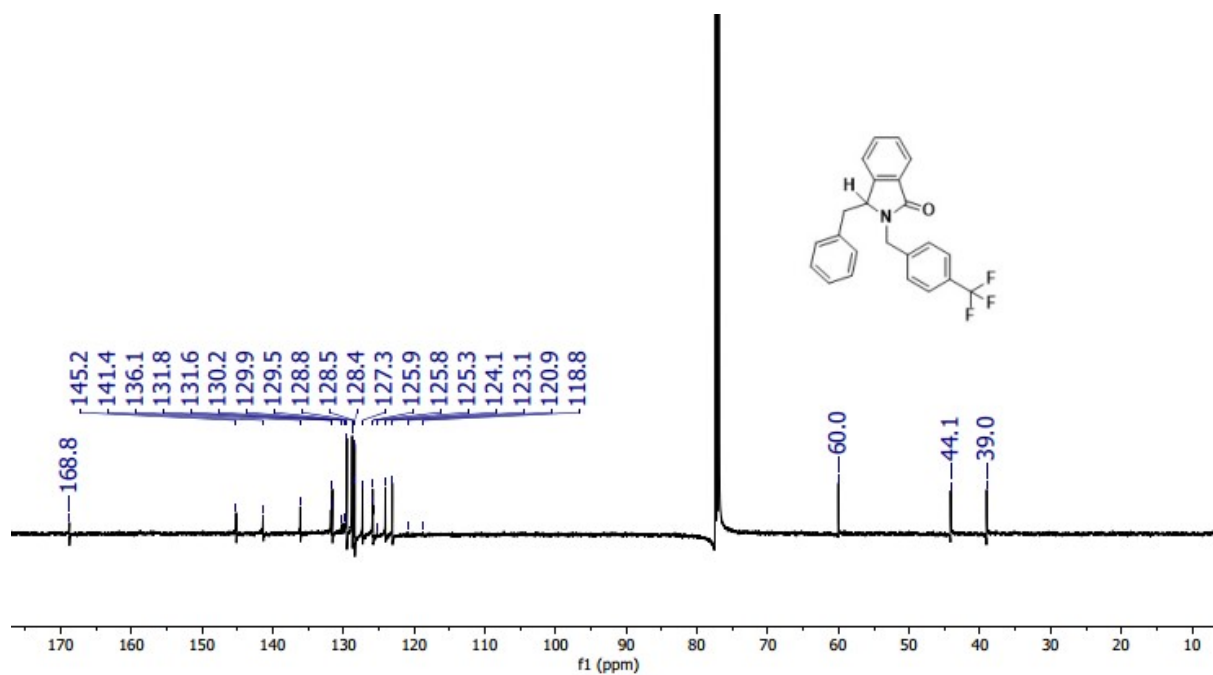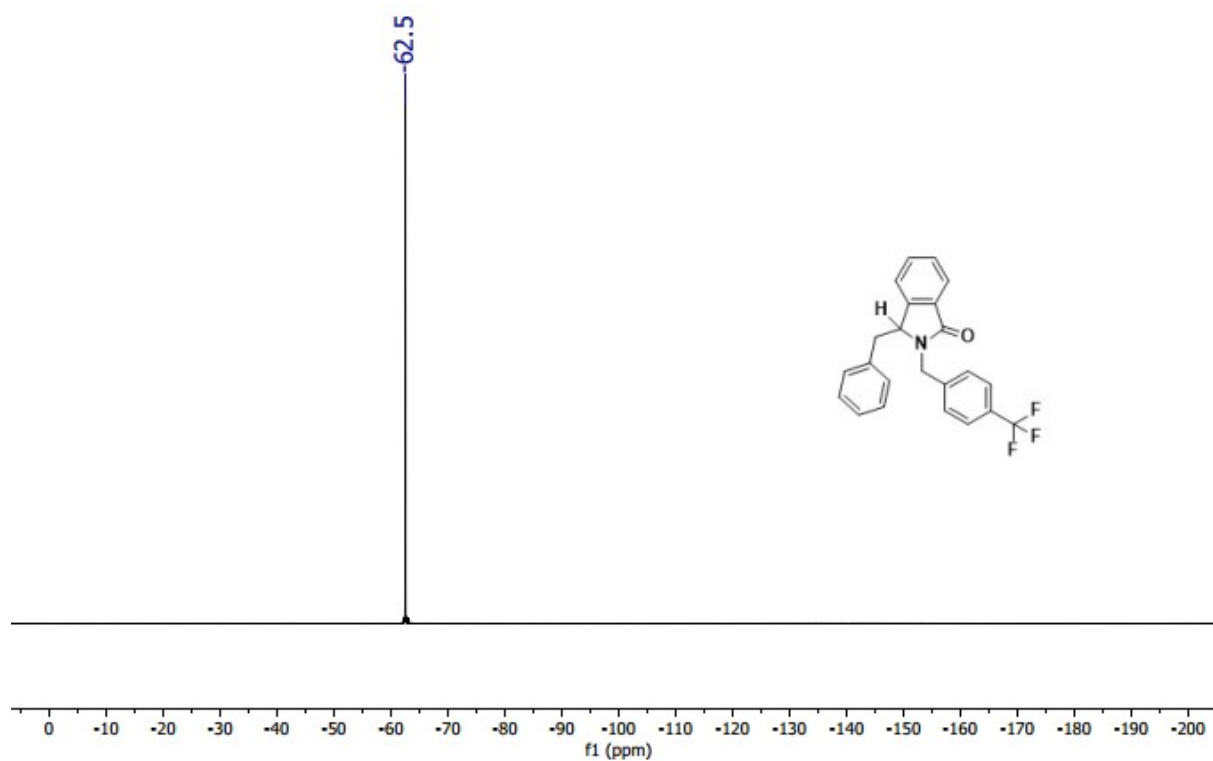



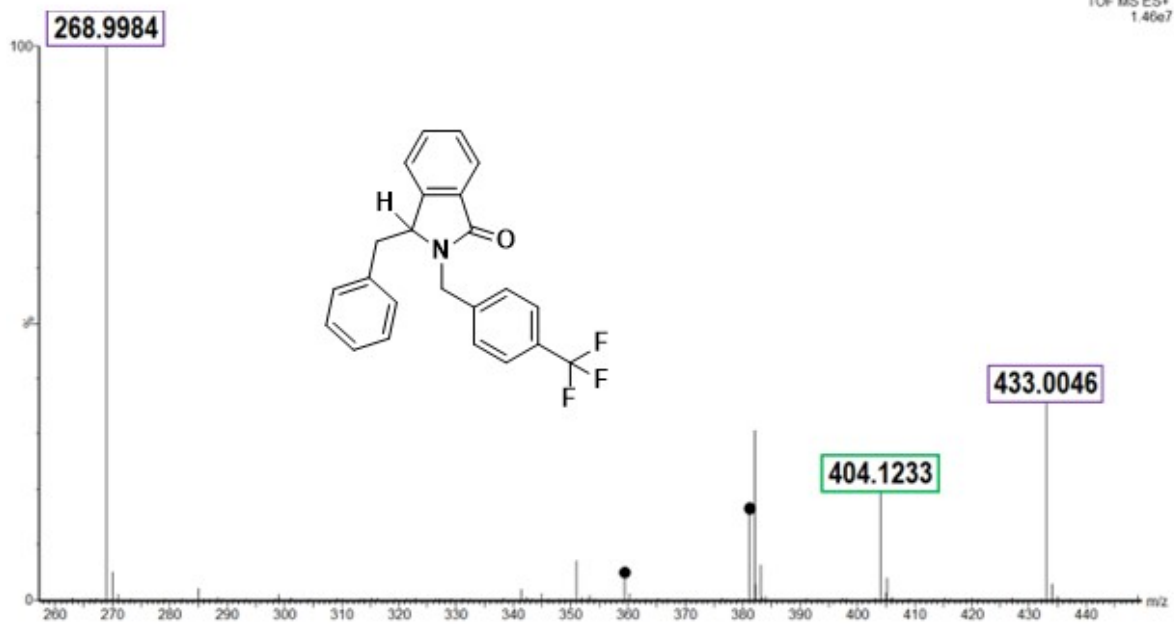

### Synthesis of 3-Benzyl-2-(4-methylbenzyl)isoindolin-1-one (**1g**)

Following the procedure for the synthesis of 3-alkylisoindolin-1-ones **1** using (Z)-3-benzylideneisobenzofuran-1(3H)-one **2a** (111 mg, 0.5 mmol, 1 equiv.) and 4-methylbenzylamine (0.127 mL, 1 mmol, 2 equiv.) with purification using column chromatography (*n*-hexane/ethyl acetate, 9:1), afforded the desired compound **1g**.

White solid; mp: 118-120°C; yield: 130 mg (79%).

IR (KBr): 3025, 2973, 2924, 2865, 1681, 1404, 1072, 702 cm<sup>-1</sup>.

<sup>1</sup>H-NMR (CDCl<sub>3</sub>, 500 MHz): δ = 7.81 (d, *J* = 8.0 Hz, 1H, CH<sub>Ar</sub>), 7.41-7.34 (m, 2H, CH<sub>Ar</sub>), 7.24-7.21 (m, 3H, CH<sub>Ar</sub>), 7.14-7.10 (m, 4H, CH<sub>Ar</sub>), 7.00-6.97 (m, 2H, CH<sub>Ar</sub>), 6.83 (d, *J* = 8.0 Hz, 1H, CH<sub>Ar</sub>), 5.42 (d, *J* = 15.0 Hz, 1H, CH<sub>2</sub>), 4.54 (dd, *J* = 8.0 and 5.0 Hz, 1H, CH), 4.16 (d, *J* = 15.0 Hz, 1H, CH<sub>2</sub>), 3.36 (dd, *J* = 14.0 and 5.0 Hz, 1H, CH<sub>2</sub>), 2.80 (dd, *J* = 14.0 and 8.0 Hz, 1H, CH<sub>2</sub>), 2.32 (s, 3H, CH<sub>3</sub>).

<sup>13</sup>C-NMR (CDCl<sub>3</sub>, 125 MHz): δ = 168.5 (C=O), 145.2 (C<sub>Ar</sub>), 137.5 (C<sub>Ar</sub>), 136.2 (C<sub>Ar</sub>), 134.3 (C<sub>Ar</sub>), 132.2 (C<sub>Ar</sub>), 131.2 (CH<sub>Ar</sub>), 129.6 (2CH<sub>Ar</sub>), 129.5 (2CH<sub>Ar</sub>), 128.6 (2CH<sub>Ar</sub>), 128.3<sub>3</sub> (2CH<sub>Ar</sub>), 128.3<sub>2</sub> (CH<sub>Ar</sub>), 127.1 (CH<sub>Ar</sub>), 123.9 (CH<sub>Ar</sub>), 123.1 (CH<sub>Ar</sub>), 59.6 (CH), 44.1 (CH<sub>2</sub>), 38.5 (CH<sub>2</sub>), 21.3 (CH<sub>3</sub>).

HR-MS (ESI): *m/z* [M+H]<sup>+</sup> calcd for C<sub>23</sub>H<sub>22</sub>NO<sup>+</sup>: 328.1696, found: 328.1693.

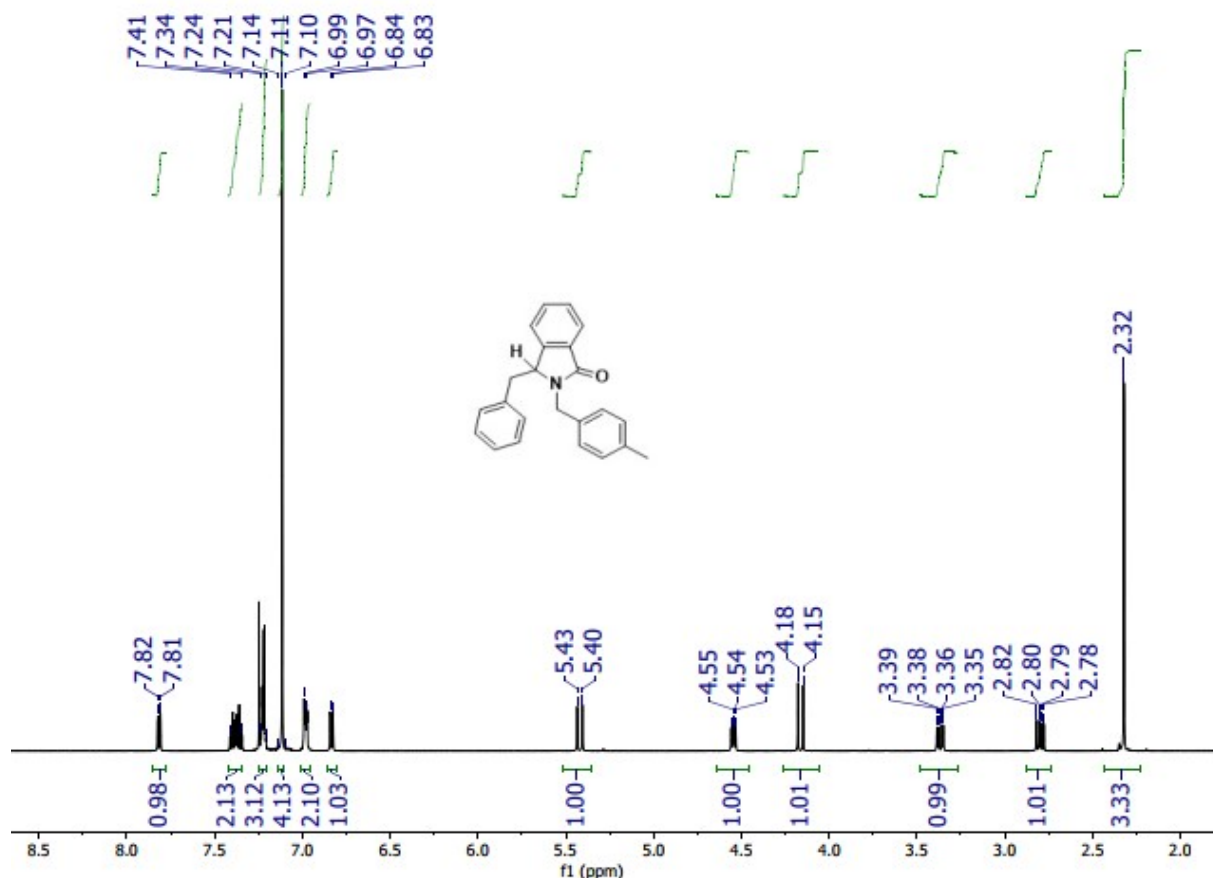

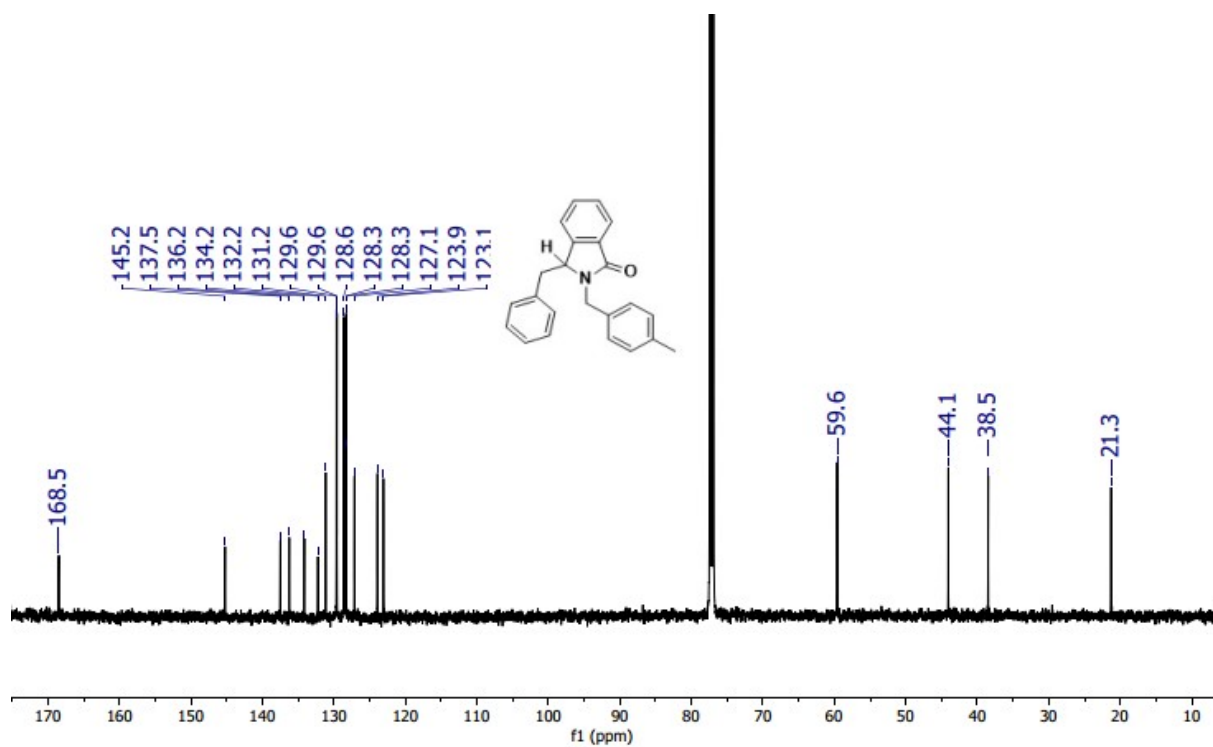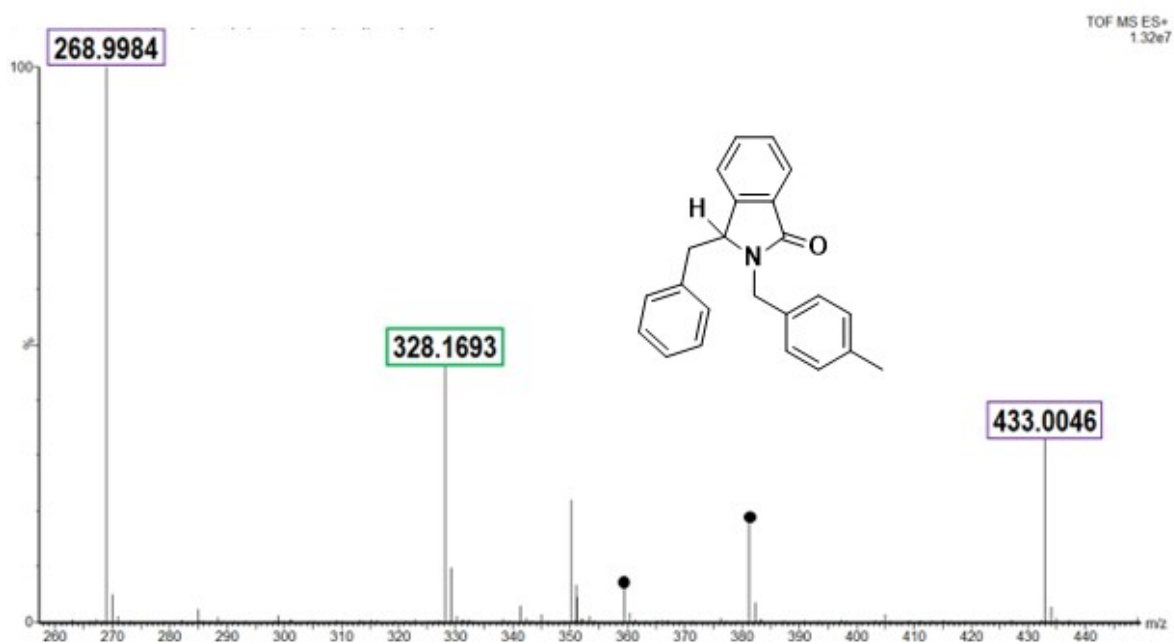

### Synthesis of 3-Benzyl-2-(4-methoxybenzyl)isoindolin-1-one (1h)

Following the procedure for the synthesis of 3-alkylisoindolin-1-ones **1** using (Z)-3-benzylideneisobenzofuran-1(3H)-one **2a** (111 mg, 0.5 mmol, 1 equiv.) and 4-methoxybenzylamine (0.130 mL, 1 mmol, 2 equiv.) with purification using column chromatography (*n*-hexane/ethyl acetate, 9:1), afforded the desired compound **1h**.

White solid; mp: 92-98°C; yield: 148 mg (86%).

IR (KBr): 3025, 2973, 2924, 2860, 1682, 1512, 1404, 1242, 1180, 1072, 756, 702 cm<sup>-1</sup>.

<sup>1</sup>H-NMR (CDCl<sub>3</sub>, 500 MHz): δ = 7.82 (d, *J* = 7.0 Hz, 1H, CH<sub>Ar</sub>), 7.41 (td, *J* = 7.0 and 1 Hz, 1H, CH<sub>Ar</sub>), 7.37 (td, *J* = 7.0 and 1 Hz, 1H, CH<sub>Ar</sub>), 7.25-7.23 (m, 3H, CH<sub>Ar</sub>), 7.16 (d, *J* = 8.0 Hz, 2H, CH<sub>Ar</sub>), 7.01 (d, *J* = 8.0 Hz, 1H, CH<sub>Ar</sub>), 7.00 (d, *J* = 7.0 Hz, 1H, CH<sub>Ar</sub>), 6.86-6.84 (m, 1H, CH<sub>Ar</sub>), 6.84 (d, *J* = 8.0 Hz, 2H, CH<sub>Ar</sub>), 5.41 (d, *J* = 15.0 Hz, 1H, CH<sub>2</sub>), 4.55 (dd, *J* = 8.0 and 5.0 Hz, 1H, CH), 4.15 (d, *J* = 15.0 Hz, 1H, CH<sub>2</sub>), 3.79 (s, 3H, CH<sub>3</sub>) 3.37 (dd, *J* = 13.5 and 5.0 Hz, 1H, CH<sub>2</sub>), 2.82 (dd, *J* = 13.5 and 8.0 Hz, 1H, CH<sub>2</sub>).

<sup>13</sup>C-NMR (CDCl<sub>3</sub>, 125 MHz): δ = 168.5 (C=O), 159.2 (C<sub>Ar</sub>), 145.2 (C<sub>Ar</sub>), 136.3 (C<sub>Ar</sub>), 132.3 (C<sub>Ar</sub>), 131.2 (CH<sub>Ar</sub>), 129.6 (4CH<sub>Ar</sub>), 129.3 (C<sub>Ar</sub>), 128.7 (2CH<sub>Ar</sub>), 128.3 (CH<sub>Ar</sub>), 127.1 (CH<sub>Ar</sub>), 123.9 (CH<sub>Ar</sub>), 123.1 (CH<sub>Ar</sub>), 114.3 (2CH<sub>Ar</sub>), 59.6 (CH), 55.4 (CH<sub>3</sub>), 43.7 (CH<sub>2</sub>), 38.5 (CH<sub>2</sub>).

HR-MS (ESI): *m/z* [M+H]<sup>+</sup> calcd for C<sub>23</sub>H<sub>22</sub>NO<sub>2</sub><sup>+</sup>: 344.1645, found: 344.1645.

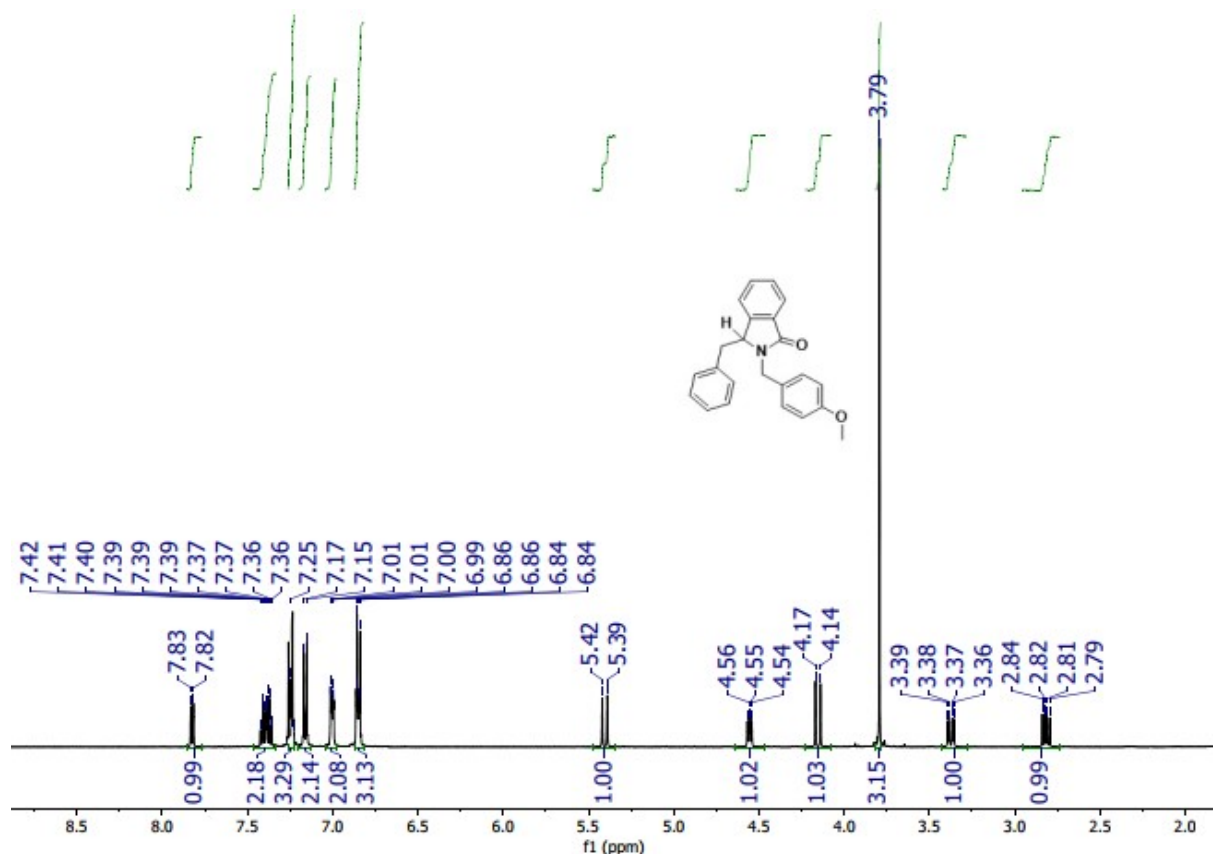

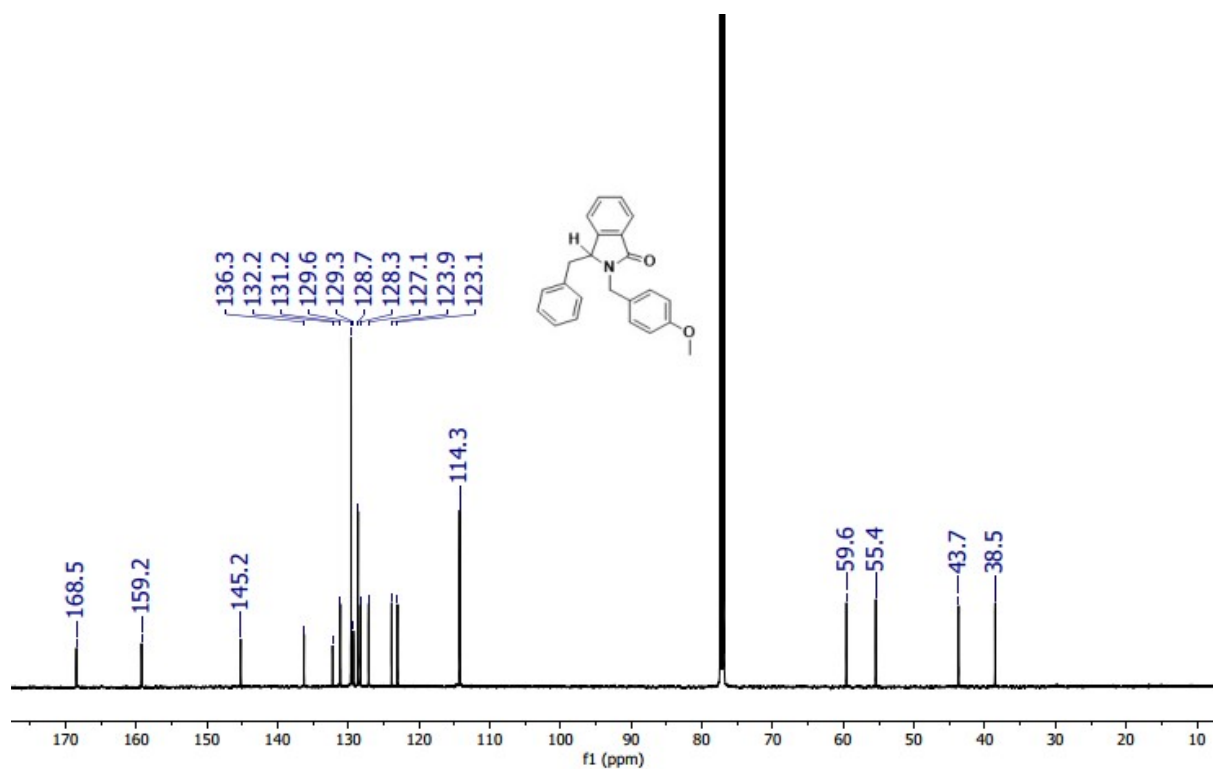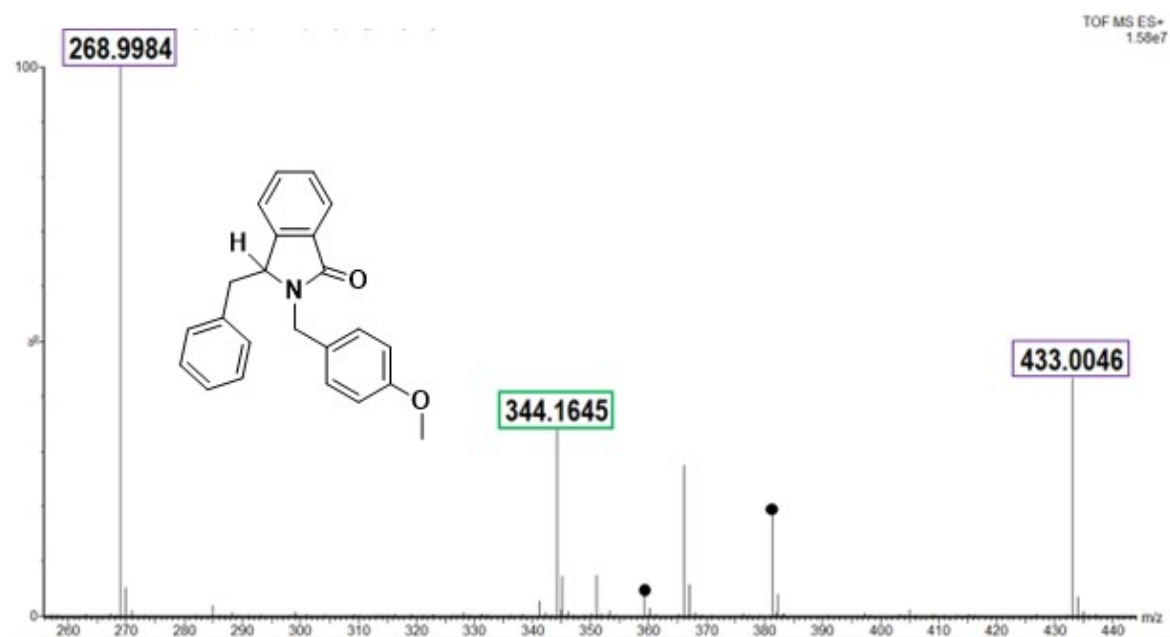

### Synthesis of 3-Benzyl-2-(3-methoxybenzyl)isoindolin-1-one (**1i**)

Following the procedure for the synthesis of 3-alkylisoindolin-1-ones **1** using (*Z*)-3-benzylideneisobenzofuran-1(3*H*)-one **2a** (111 mg, 0.5 mmol, 1 equiv.) and 3-methoxybenzylamine (0.128 mL, 1 mmol, 2 equiv.) with purification using column chromatography (*n*-hexane/ethyl acetate, 9:1), afforded the desired compound **1i**.

Yellow oil; yield: 131 mg (76%).

IR (nujol): 3025, 2973, 2924, 2860, 1682, 1512, 1411, 1257, 1049, 702 cm<sup>-1</sup>.

<sup>1</sup>H-NMR (CDCl<sub>3</sub>, 500 MHz): δ = 7.83 (d, *J* = 6.5 Hz, 1H, CH<sub>Ar</sub>), 7.42 (td, *J* = 6.5 and 1 Hz, 1H, CH<sub>Ar</sub>), 7.38 (td, *J* = 6.5 and 1 Hz, 1H, CH<sub>Ar</sub>), 7.25-7.22 (m, 4H, CH<sub>Ar</sub>), 7.00 (dd, *J* = 7.5 and 2 Hz, 2H, CH<sub>Ar</sub>), 6.87 (d, *J* = 6.5 Hz, 1H, CH<sub>Ar</sub>), 6.83 (d, *J* = 2 Hz, 1H, CH<sub>Ar</sub>), 6.81 (d, *J* = 2 Hz, 1H, CH<sub>Ar</sub>), 6.76 (t, *J* = 2 Hz, 1H, CH<sub>Ar</sub>), 5.43 (d, *J* = 15.0 Hz, 1H, CH<sub>2</sub>), 4.60 (dd, *J* = 8.0 and 5.0 Hz, 1H, CH), 4.19 (d, *J* = 15.0 Hz, 1H, CH<sub>2</sub>), 3.77 (s, 3H, CH<sub>3</sub>), 3.37 (dd, *J* = 14.0 and 5.0 Hz, 1H, CH<sub>2</sub>), 2.83 (dd, *J* = 14.0 and 8.0 Hz, 1H, CH<sub>2</sub>).

<sup>13</sup>C-NMR (CDCl<sub>3</sub>, 125 MHz): δ = 168.5 (C=O), 160.1 (C<sub>Ar</sub>), 145.2 (C<sub>Ar</sub>), 138.8 (C<sub>Ar</sub>), 136.2 (C<sub>Ar</sub>), 132.1 (C<sub>Ar</sub>), 131.2 (CH<sub>Ar</sub>), 129.9 (CH<sub>Ar</sub>), 129.6 (2CH<sub>Ar</sub>), 128.7 (2CH<sub>Ar</sub>), 128.3 (CH<sub>Ar</sub>), 127.1 (CH<sub>Ar</sub>), 124.0 (CH<sub>Ar</sub>), 123.1 (CH<sub>Ar</sub>), 120.6 (CH<sub>Ar</sub>), 113.8 (CH<sub>Ar</sub>), 113.3 (CH<sub>Ar</sub>), 59.7 (CH), 55.4 (CH<sub>3</sub>), 44.3 (CH<sub>2</sub>), 38.6 (CH<sub>2</sub>).

HR-MS (ESI): *m/z* [M+H]<sup>+</sup> calcd for C<sub>23</sub>H<sub>22</sub>NO<sub>2</sub><sup>+</sup>: 344.1645, found: 344.1646.

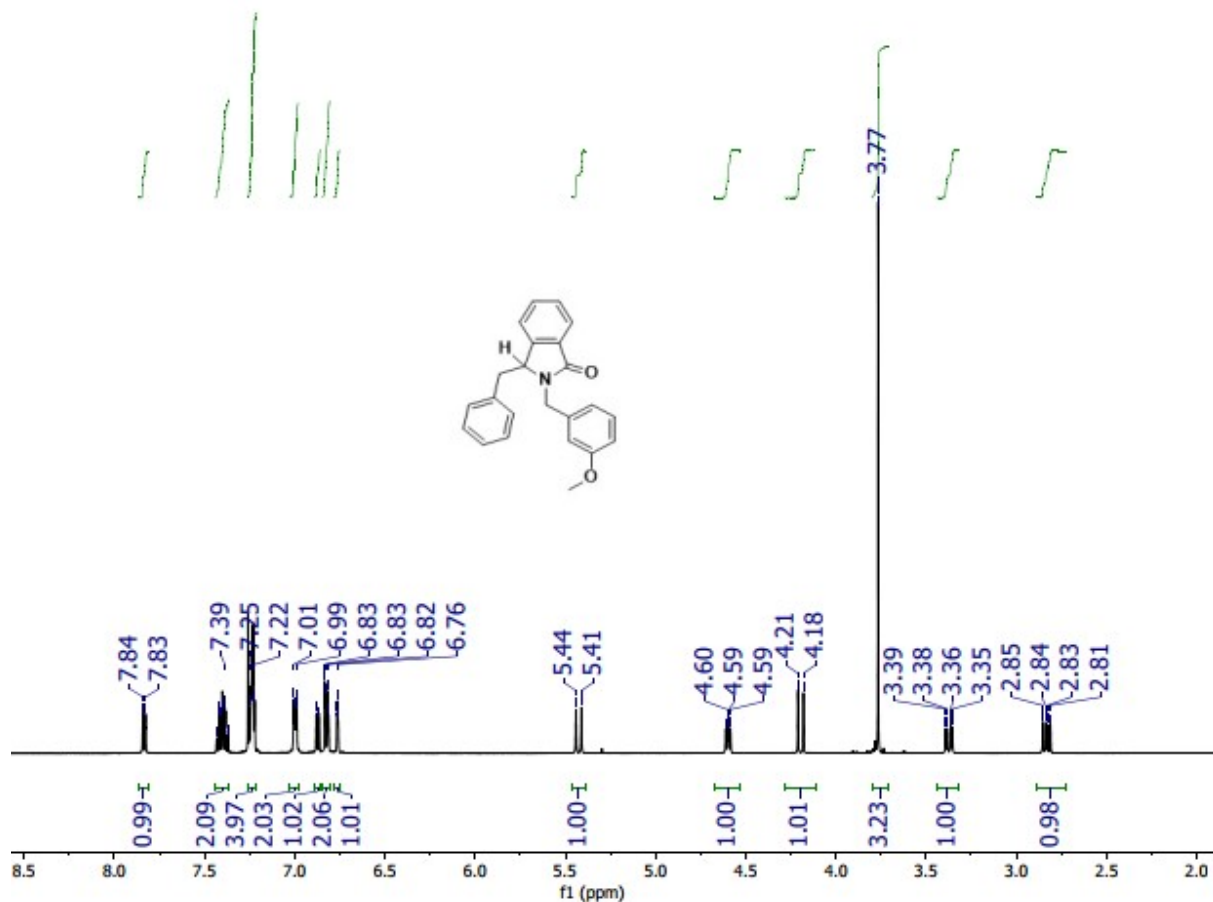

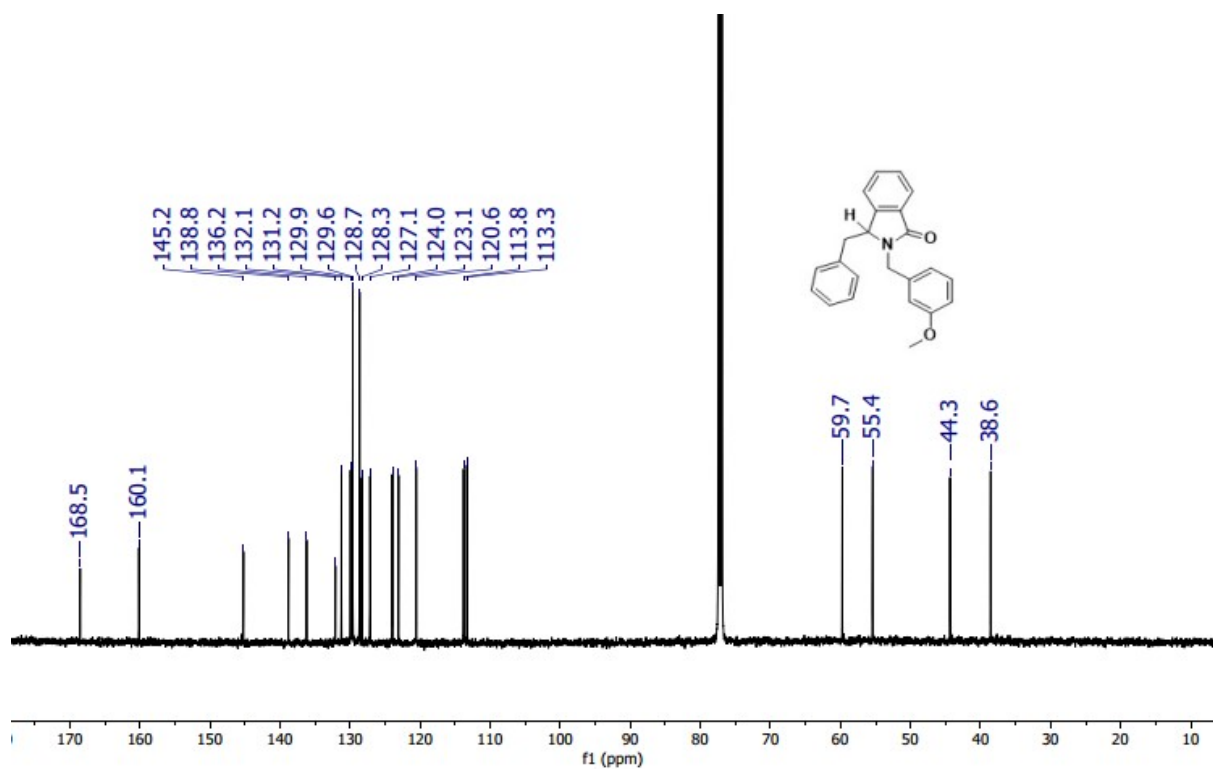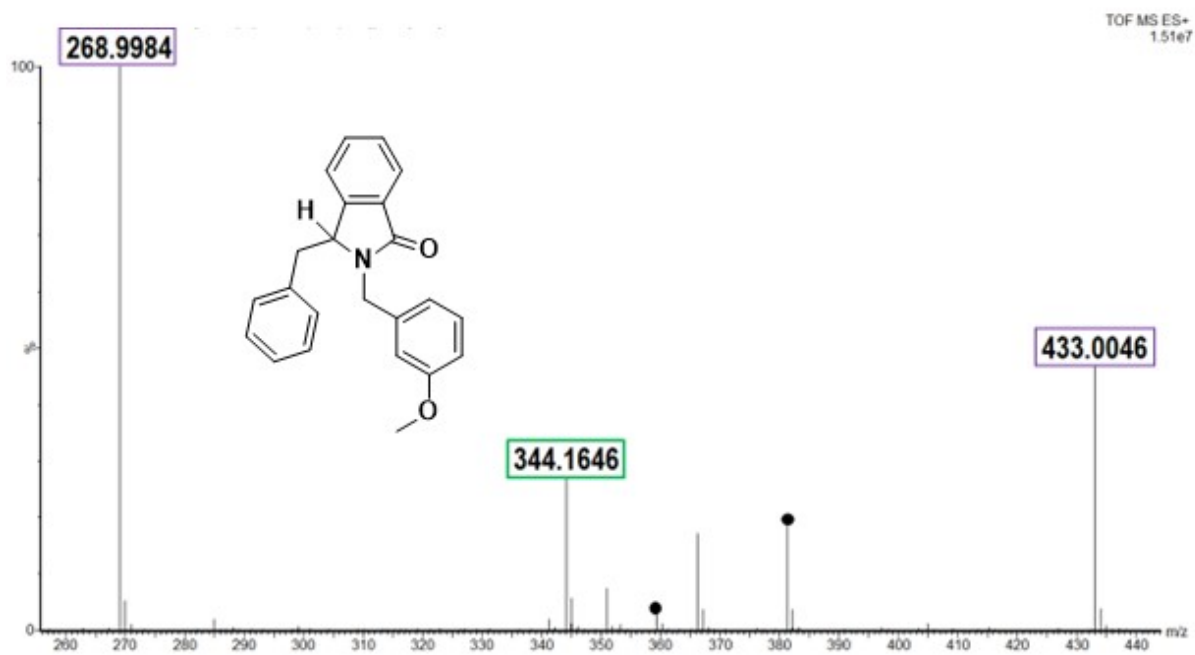

### Synthesis of 3-Benzyl-2-(2-methoxybenzyl)isoindolin-1-one (**1j**)

Following the procedure for the synthesis of 3-alkylisoindolin-1-ones **1** using (*Z*)-3-benzylideneisobenzofuran-1(3*H*)-one **2a** (111 mg, 0.5 mmol, 1 equiv.) and 2-methoxybenzylamine (0.130 mL, 1 mmol, 2 equiv.) with purification using column chromatography (*n*-hexane/ethyl acetate, 9:1), afforded the desired compound **1j**.

Yellow oil; yield: 130 mg (76%).

IR (nujol): 3032, 2973, 2924, 2860, 1682, 1412, 1103, 756, 702  $\text{cm}^{-1}$ .

$^1\text{H-NMR}$  ( $\text{CDCl}_3$ , 500 MHz):  $\delta$  = 7.77 (d,  $J$  = 7.0 Hz, 1H,  $\text{CH}_{\text{Ar}}$ ), 7.37-7.32 (m, 2H,  $\text{CH}_{\text{Ar}}$ ), 7.28-7.20 (m, 5H,  $\text{CH}_{\text{Ar}}$ ), 6.99-6.98 (m, 2H,  $\text{CH}_{\text{Ar}}$ ), 6.91-6.90 (m, 2H,  $\text{CH}_{\text{Ar}}$ ), 6.78 (d,  $J$  = 7 Hz, 1H,  $\text{CH}_{\text{Ar}}$ ), 5.23 (d,  $J$  = 15.0 Hz, 1H,  $\text{CH}_2$ ), 4.59 (m, 2H, CH and  $\text{CH}_2$ ), 3.87 (s, 3H,  $\text{CH}_3$ ) 3.56-3.53 (m, 1H,  $\text{CH}_2$ ), 2.80-2.75 (m, 1H,  $\text{CH}_2$ ).

$^{13}\text{C-NMR}$  ( $\text{CDCl}_3$ , 125 MHz):  $\delta$  = 168.6 (C=O), 157.5 ( $\text{C}_{\text{Ar}}$ ), 145.3 ( $\text{C}_{\text{Ar}}$ ), 136.4 ( $\text{C}_{\text{Ar}}$ ), 132.4 ( $\text{C}_{\text{Ar}}$ ), 130.9 ( $\text{CH}_{\text{Ar}}$ ), 130.5 ( $\text{CH}_{\text{Ar}}$ ), 129.7 (2 $\text{CH}_{\text{Ar}}$ ), 129.1 ( $\text{CH}_{\text{Ar}}$ ), 128.5 (2 $\text{CH}_{\text{Ar}}$ ), 128.1 ( $\text{CH}_{\text{Ar}}$ ), 127.0 ( $\text{CH}_{\text{Ar}}$ ), 125.5 ( $\text{C}_{\text{Ar}}$ ), 123.7 ( $\text{CH}_{\text{Ar}}$ ), 123.1 ( $\text{CH}_{\text{Ar}}$ ), 121.1 ( $\text{CH}_{\text{Ar}}$ ), 110.6 ( $\text{CH}_{\text{Ar}}$ ), 60.2 (CH), 55.6 ( $\text{CH}_3$ ), 38.6 ( $\text{CH}_2$ ), 38.1 ( $\text{CH}_2$ ).

HR-MS (ESI):  $m/z$  [ $\text{M}+\text{H}$ ] $^+$  calcd for  $\text{C}_{23}\text{H}_{22}\text{NO}_2^+$ : 344.1645, found: 344.1642.

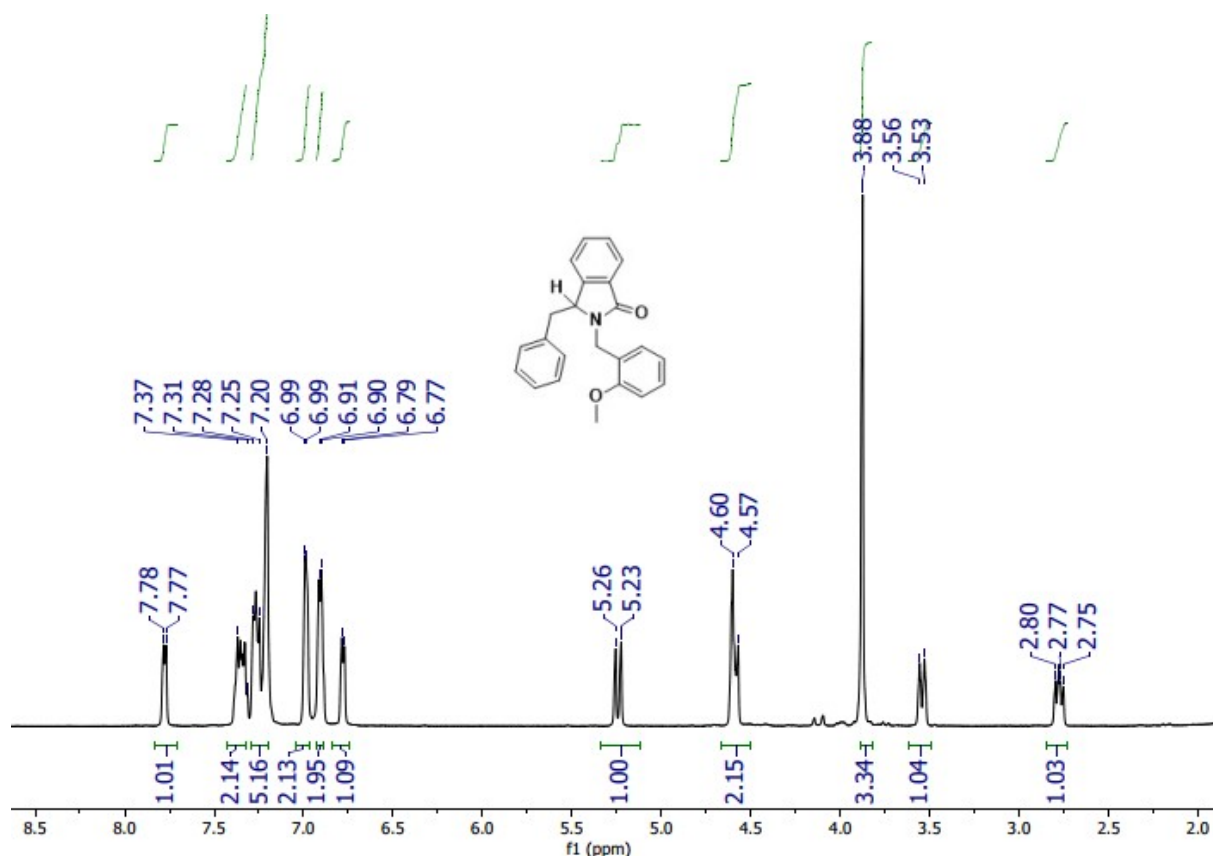



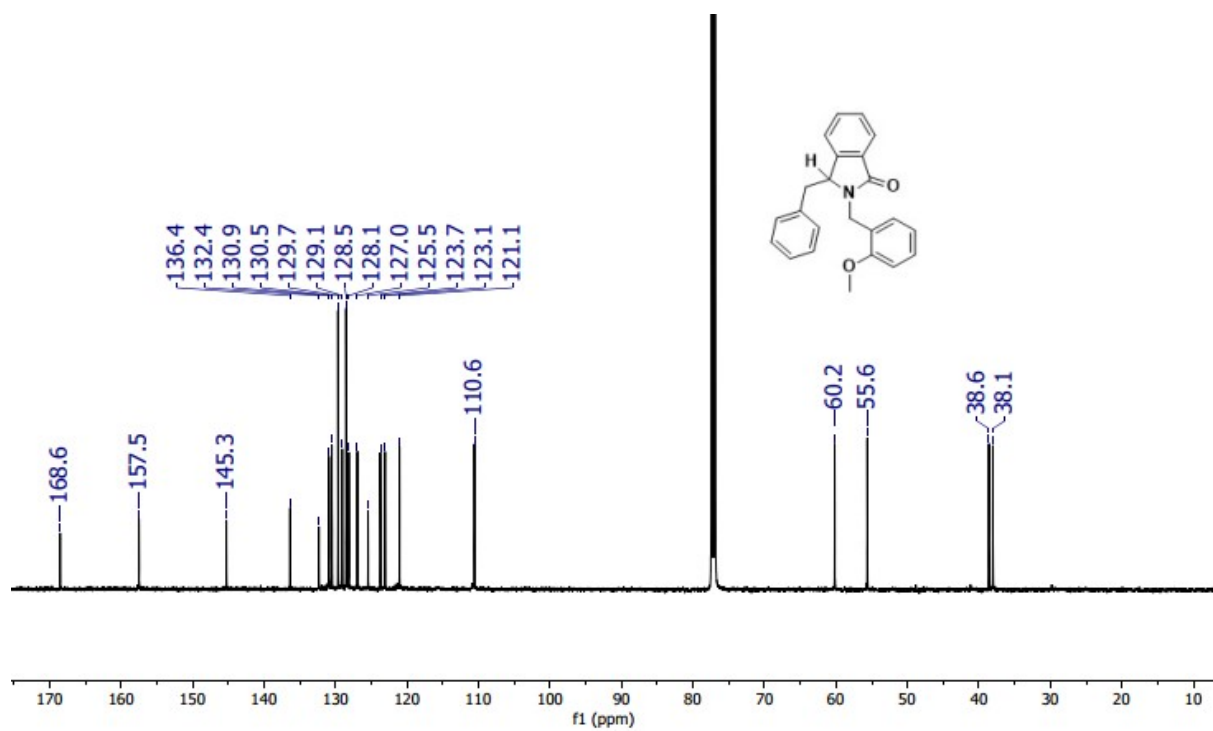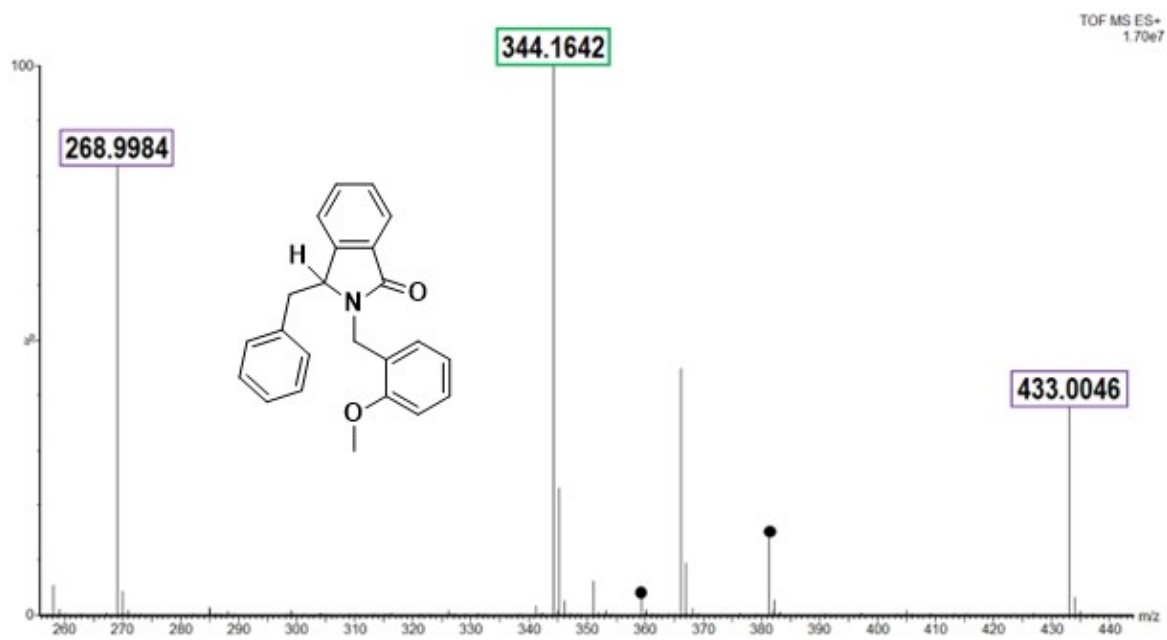

### Synthesis of 3-Benzyl-2-(furan-2-ylmethyl)isoindolin-1-one (1k)

Following the procedure for the synthesis of 3-alkylisoindolin-1-ones **1** using (Z)-3-benzylideneisobenzofuran-1(3H)-one **2a** (111 mg, 0.5 mmol, 1 equiv.) and furfurylamine (0.088 mL, 1 mmol, 2 equiv.) with purification using column chromatography (*n*-hexane/ethyl acetate, 9:1), afforded the desired compound **1k**.

Orange solid; mp: 98-101 °C; yield: 120 mg (79%).

IR (KBr): 3032, 2973, 2932, 2860, 1682, 1466, 1420, 1211, 1103, 756, 710 cm<sup>-1</sup>.

<sup>1</sup>H-NMR (CDCl<sub>3</sub>, 500 MHz): δ = 7.81-7.79 (m, 1H, CH<sub>Ar</sub>), 7.41-7.35 (m, 3H, CH<sub>Ar</sub>), 7.28-7.22 (m, 3H, CH<sub>Ar</sub>), 7.06-7.04 (m, 2H, CH<sub>Ar</sub>), 6.87-6.85 (m, 1H, CH<sub>Ar</sub>), 6.33 (dd, *J* = 3.5 and 1.0 Hz, 1H, CH<sub>Ar</sub>), 6.27 (d, *J* = 3.5 Hz, 1H, CH<sub>Ar</sub>), 5.33 (d, *J* = 16.0 Hz, 1H, CH<sub>2</sub>), 4.67 (dd, *J* = 8.0 and 5.0 Hz, 1H, CH), 4.30 (d, *J* = 15.0 Hz, 1H, CH<sub>2</sub>), 3.47 (dd, *J* = 14.0 and 5.0 Hz, 1H, CH<sub>2</sub>), 2.82 (dd, *J* = 14.0 and 8.5 Hz, 1H, CH<sub>2</sub>).

<sup>13</sup>C-NMR (CDCl<sub>3</sub>, 125 MHz): δ = 168.2 (C=O), 150.6 (C<sub>Ar</sub>), 145.2 (C<sub>Ar</sub>), 142.6 (CH<sub>Ar</sub>), 136.2 (C<sub>Ar</sub>), 132.0 (C<sub>Ar</sub>), 131.3 (CH<sub>Ar</sub>), 129.7 (2CH<sub>Ar</sub>), 128.7 (2CH<sub>Ar</sub>), 128.3 (CH<sub>Ar</sub>), 127.2 (CH<sub>Ar</sub>), 123.9 (CH<sub>Ar</sub>), 123.1 (CH<sub>Ar</sub>), 110.6 (CH<sub>Ar</sub>), 108.8 (CH<sub>Ar</sub>), 60.3 (CH), 38.4 (CH<sub>2</sub>), 37.2 (CH<sub>2</sub>).

HR-MS (ESI): *m/z* [M+H]<sup>+</sup> calcd for C<sub>20</sub>H<sub>18</sub>NO<sub>2</sub><sup>+</sup>: 304.1332, found: 304.1330.

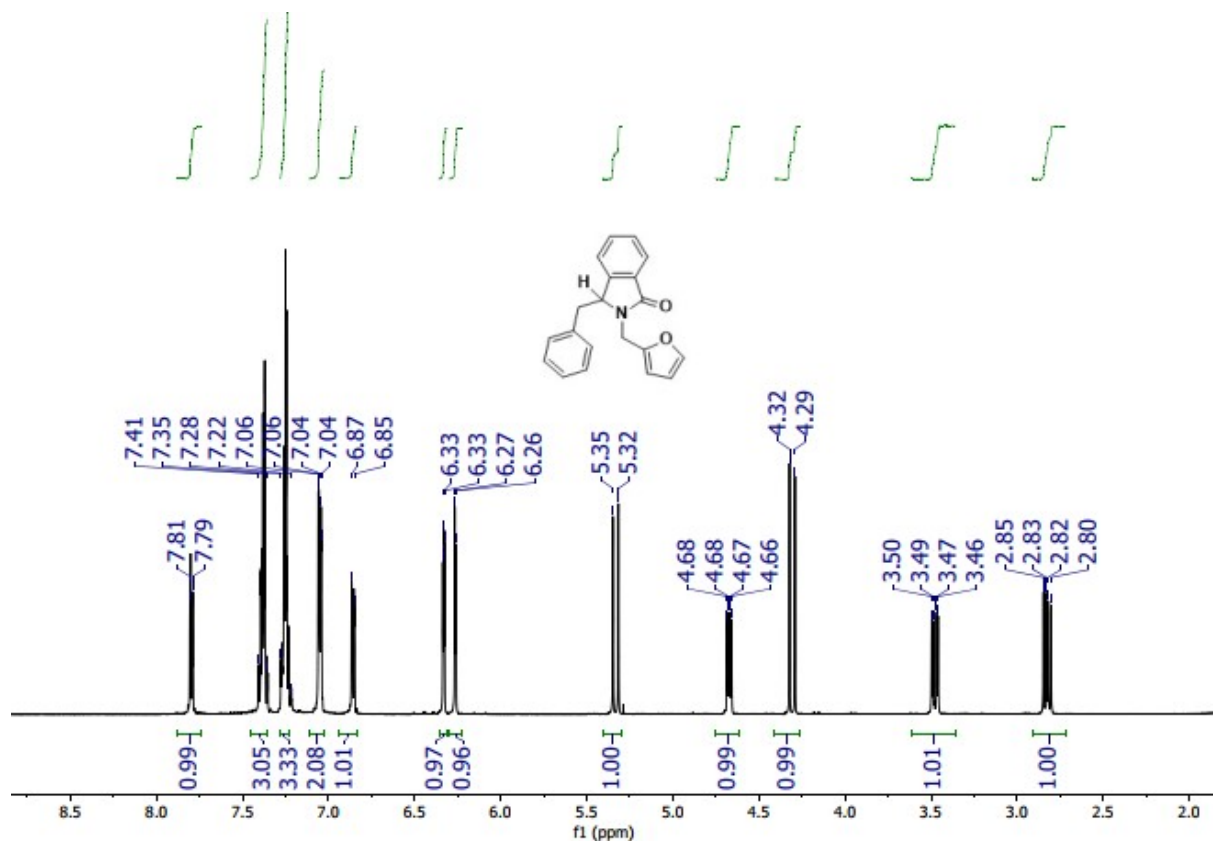

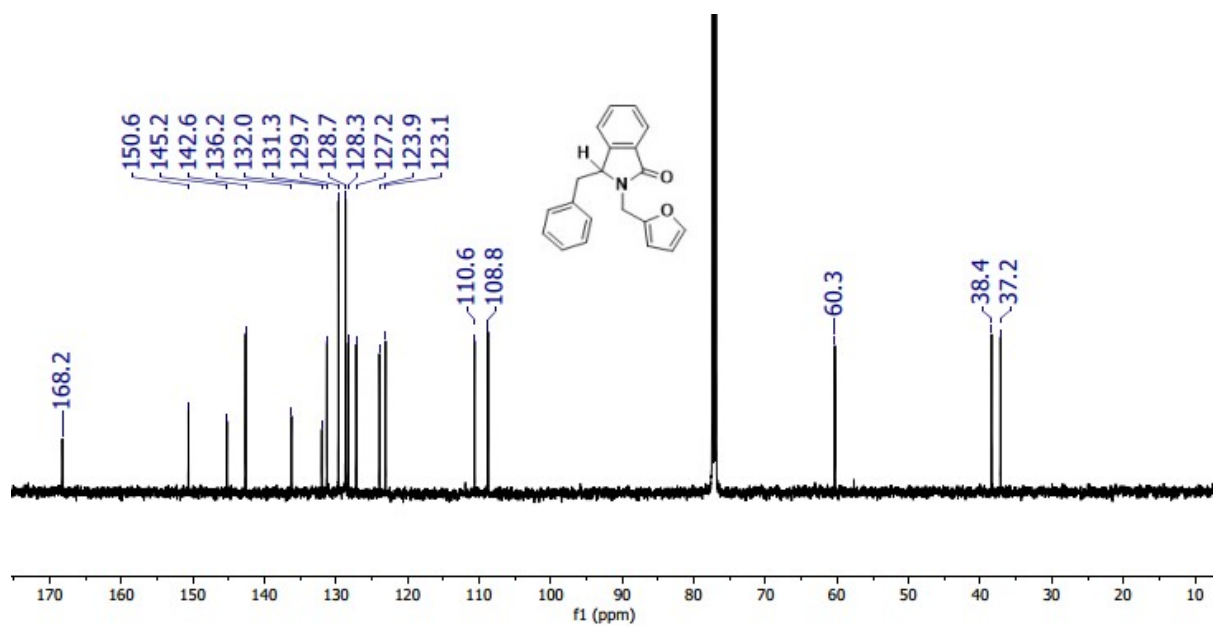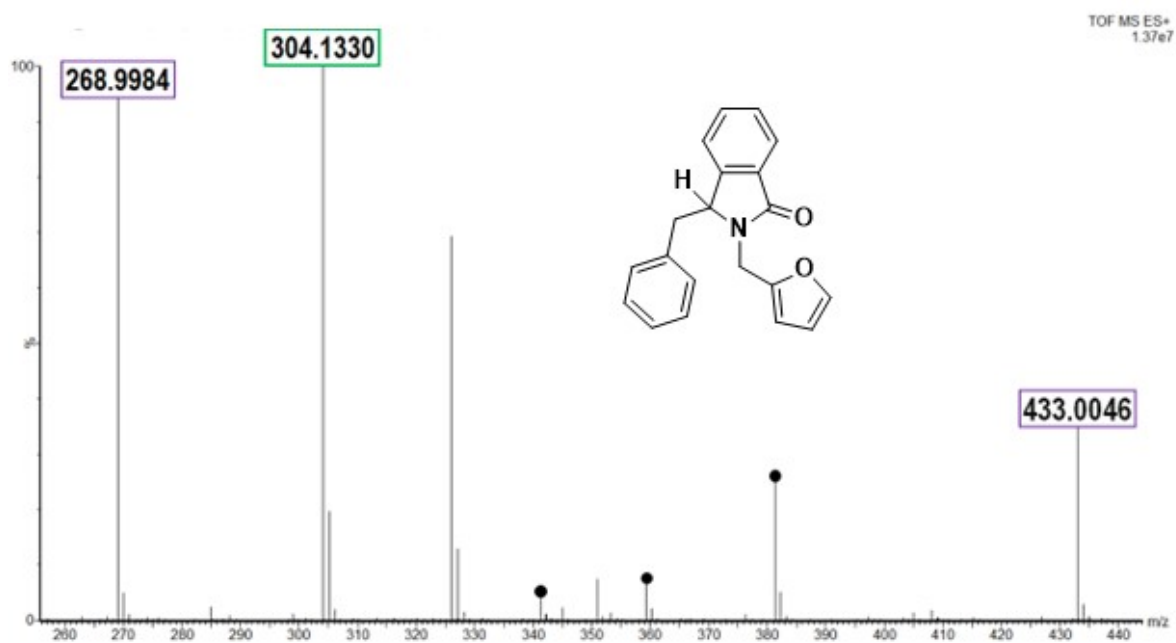

### Synthesis of 3-Benzyl-2-(thiophen-2-ylmethyl)isoindolin-1-one (**1l**)

Following the procedure for the synthesis of 3-alkylisoindolin-1-ones **1** using (*Z*)-3-benzylideneisobenzofuran-1(3*H*)-one **2a** (111 mg, 0.5 mmol, 1 equiv.) and 2-thiophenemethylamine (0.103 mL, 1 mmol, 2 equiv.) with purification using column chromatography (*n*-hexane/ethyl acetate, 9:1), afforded the desired compound **1l**.

White solid; mp: 106-108 °C; yield: 120 mg (75%).

IR (KBr): 3032, 2973, 2928, 2860, 1682, 1420, 1080, 694, 570 cm<sup>-1</sup>.

<sup>1</sup>H-NMR (CDCl<sub>3</sub>, 500 MHz): δ = 7.82 (d, *J* = 8.5 Hz, 1H, CH<sub>Ar</sub>), 7.43-7.38 (m, 2H, CH<sub>Ar</sub>), 7.29-7.23 (m, 4H, CH<sub>Ar</sub>), 7.07 (d, *J* = 7.0 Hz, 2H, CH<sub>Ar</sub>), 6.97-6.95 (m, 2H, CH<sub>Ar</sub>), 6.89 (dd, *J* = 3.5 Hz, 1H, CH<sub>Ar</sub>), 6.27 (d, *J* = 3.5 Hz, 1H, CH<sub>Ar</sub>), 5.53 (d, *J* = 16.0 Hz, 1H, CH<sub>2</sub>), 4.71 (dd, *J* = 7.5 and 5.5 Hz, 1H, CH), 4.42 (d, *J* = 15.0 Hz, 1H, CH<sub>2</sub>), 3.41 (dd, *J* = 13.5 and 5.0 Hz, 1H, CH<sub>2</sub>), 2.88 (dd, *J* = 13.5 and 8.0 Hz, 1H, CH<sub>2</sub>).

<sup>13</sup>C-NMR (CDCl<sub>3</sub>, 125 MHz): δ = 168.3 (C=O), 145.3 (C<sub>Ar</sub>), 139.6 (C<sub>Ar</sub>), 136.2 (C<sub>Ar</sub>), 131.9 (C<sub>Ar</sub>), 131.4 (CH<sub>Ar</sub>), 129.6 (2CH<sub>Ar</sub>), 128.7 (2CH<sub>Ar</sub>), 128.4 (CH<sub>Ar</sub>), 127.2 (CH<sub>Ar</sub>), 127.1 (CH<sub>Ar</sub>), 126.9 (CH<sub>Ar</sub>), 125.8 (CH<sub>Ar</sub>), 124.0 (CH<sub>Ar</sub>), 123.1 (CH<sub>Ar</sub>), 59.6 (CH), 38.9 (CH<sub>2</sub>), 38.7 (CH<sub>2</sub>).

HR-MS (ESI): *m/z* [M+H]<sup>+</sup> calcd for C<sub>20</sub>H<sub>18</sub>NOS<sup>+</sup>: 320.1104, found: 320.1102.

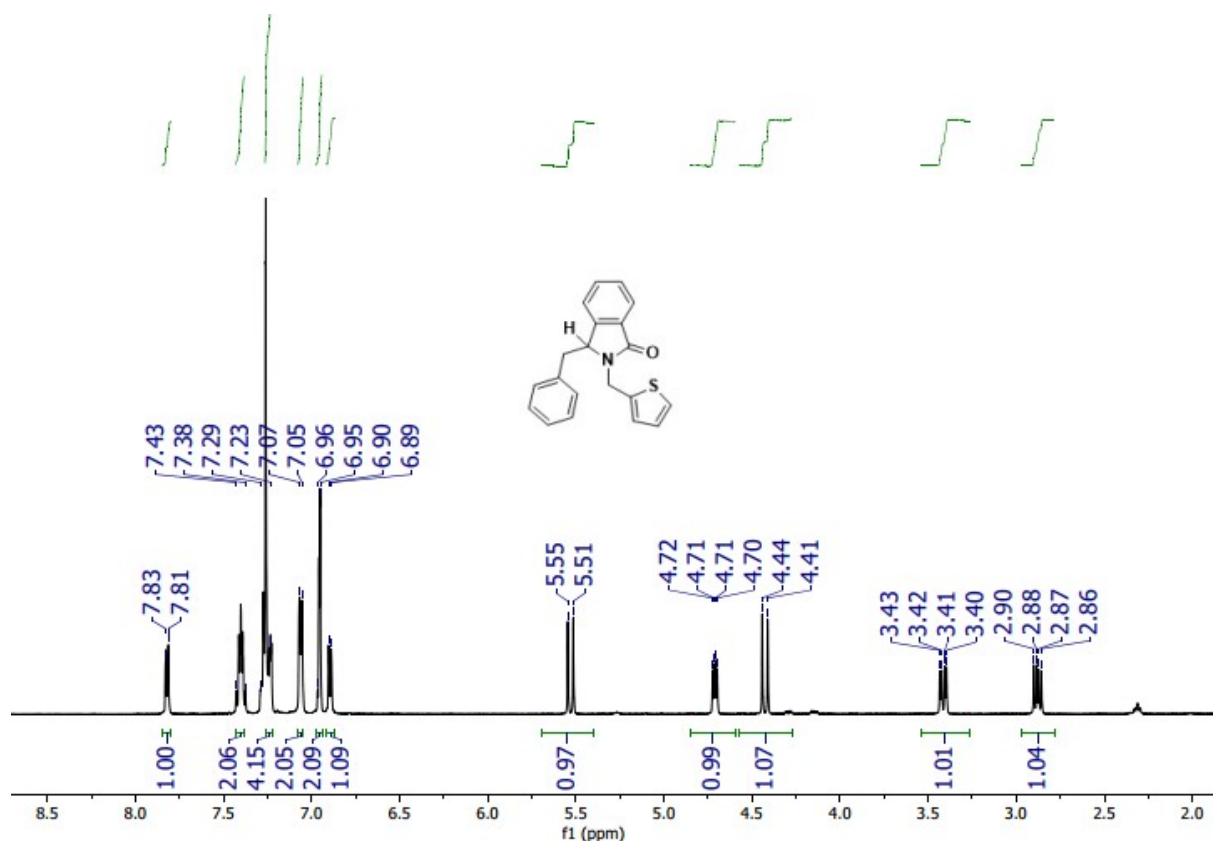

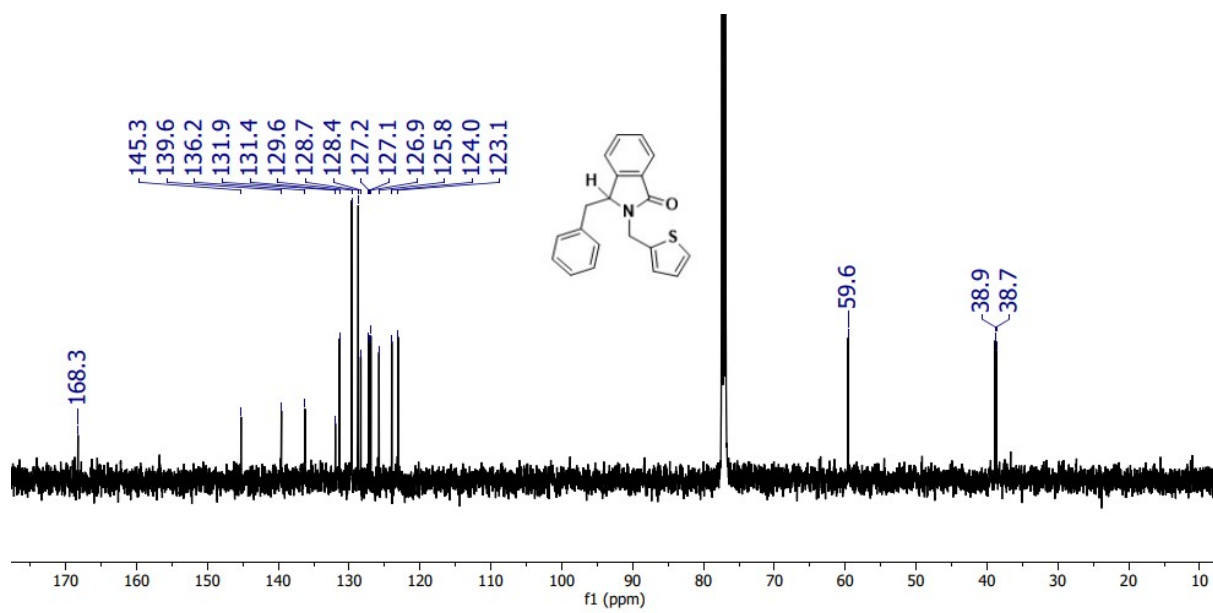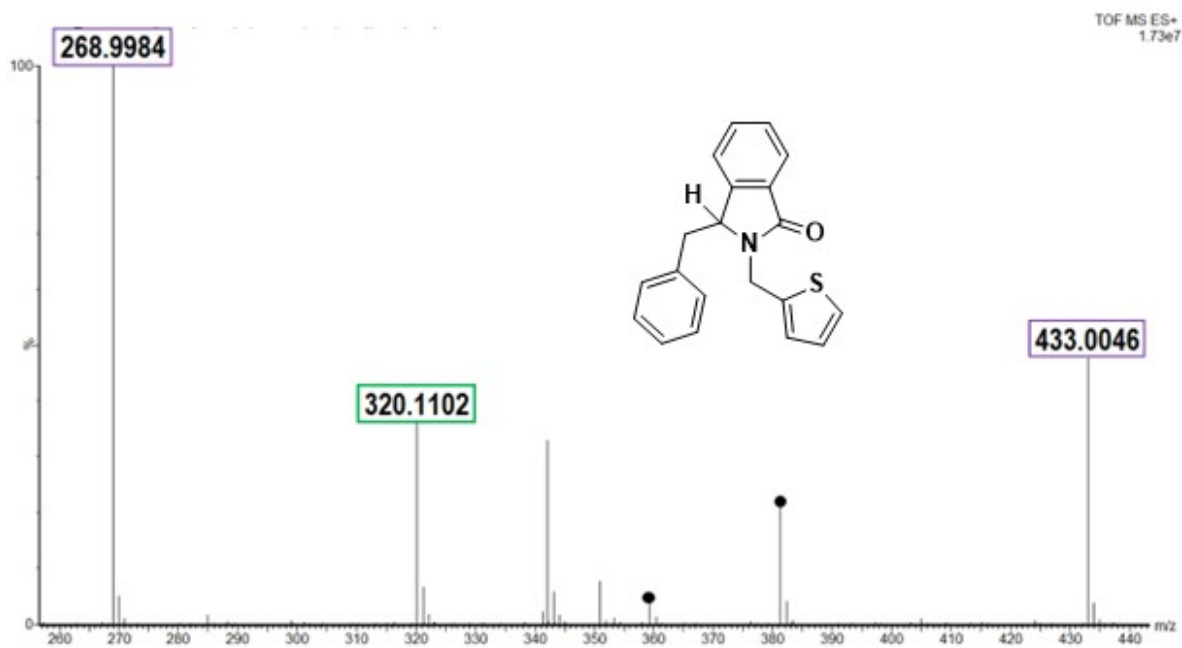

### Synthesis of 2-Butyl-3-(4-methylbenzyl)isoindolin-1-one (**1m**)

Following the procedure for the synthesis of 3-alkylisoindolin-1-ones **1** using (Z)-3-(4-methylbenzylidene)isobenzofuran-1(3H)-one **2b** (118 mg, 0.5 mmol, 1 equiv.) and *n*-butylamine (0.099 mL, 1 mmol, 2 equiv.) with purification using column chromatography (*n*-hexane/ethyl acetate, 9:1), afforded the desired compound **1m**.

White solid; mp: 96-101 °C; yield: 121 mg (82%).

IR (KBr): 3031, 2973, 2925, 2865, 1682, 1404, 1072, 702 cm<sup>-1</sup>.

<sup>1</sup>H-NMR (CDCl<sub>3</sub>, 500 MHz): δ = 7.77-7.76 (m, 1H, CH<sub>Ar</sub>), 7.39-7.37 (m, 2H, CH<sub>Ar</sub>), 7.05 (d, *J* = 8 Hz, 2H, CH<sub>Ar</sub>), 6.95 (d, *J* = 8 Hz, 2H, CH<sub>Ar</sub>), 6.94-6.93 (m, 1H, CH<sub>Ar</sub>), 4.75 (dd, *J* = 8 and 5.0 Hz, 1H, CH), 4.10-4.04 (m, 1H, CH<sub>2</sub>), 3.34 (dd, *J* = 14 and 4.5 Hz, 1H, CH<sub>2</sub>), 3.20 (ddd, *J* = 14, 8.5, 5.5 Hz, 1H, CH<sub>2</sub>), 2.77 (dd, *J* = 14 and 8 Hz, 1H, CH<sub>2</sub>), 2.31 (s, 3H, CH<sub>3</sub>), 1.69-1.58 (m, 2H, CH<sub>2</sub>), 1.39-1.31 (m, 2H, CH<sub>2</sub>), 0.94 (t, *J* = 7.0 Hz, 3H, CH<sub>3</sub>).

<sup>13</sup>C-NMR (CDCl<sub>3</sub>, 125 MHz): δ = 168.4 (C=O), 145.1 (C<sub>Ar</sub>), 136.7 (C<sub>Ar</sub>), 133.0 (C<sub>Ar</sub>), 132.6 (C<sub>Ar</sub>), 130.8 (CH<sub>Ar</sub>), 129.4 (2CH<sub>Ar</sub>), 129.3 (2CH<sub>Ar</sub>), 128.2 (CH<sub>Ar</sub>), 123.6 (CH<sub>Ar</sub>), 123.0 (CH<sub>Ar</sub>), 60.1 (CH), 40.0 (CH<sub>2</sub>), 38.0 (CH<sub>2</sub>), 30.6 (CH<sub>2</sub>), 21.2 (CH<sub>3</sub>), 20.3 (CH<sub>2</sub>), 13.9 (CH<sub>3</sub>).

HR-MS (ESI): *m/z* [M+H]<sup>+</sup> calcd for C<sub>20</sub>H<sub>24</sub>NO<sup>+</sup>: 294.1852, found: 294.1854.

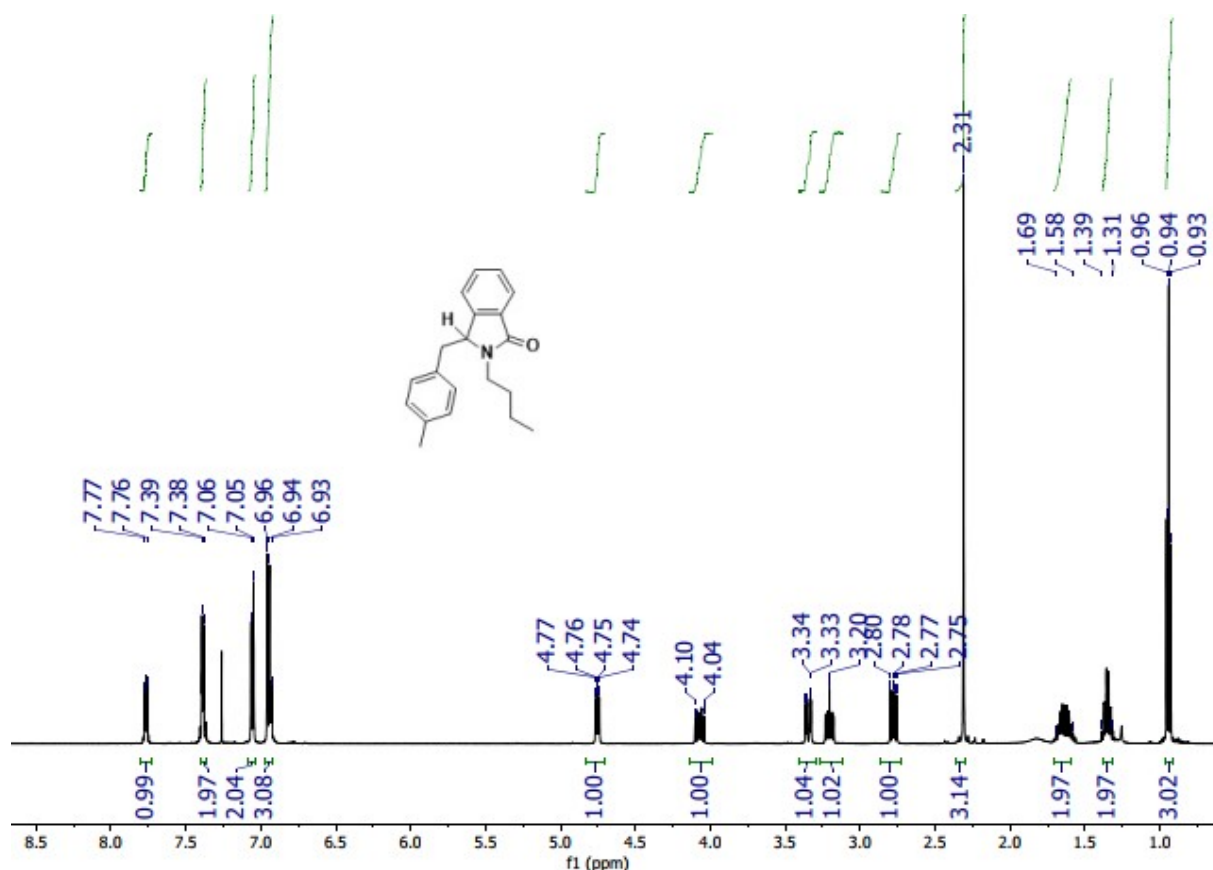

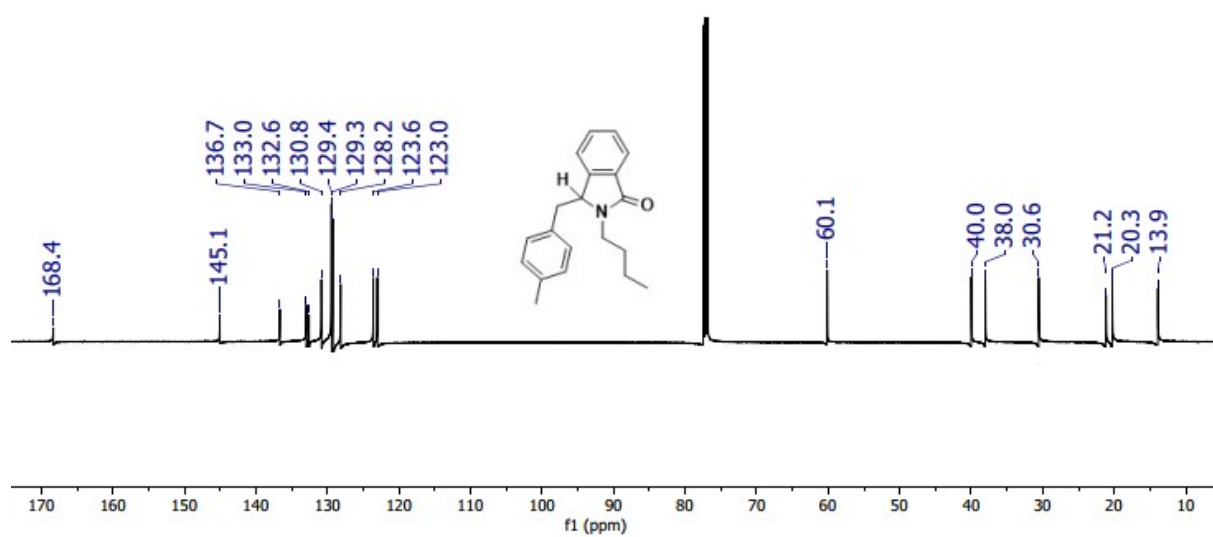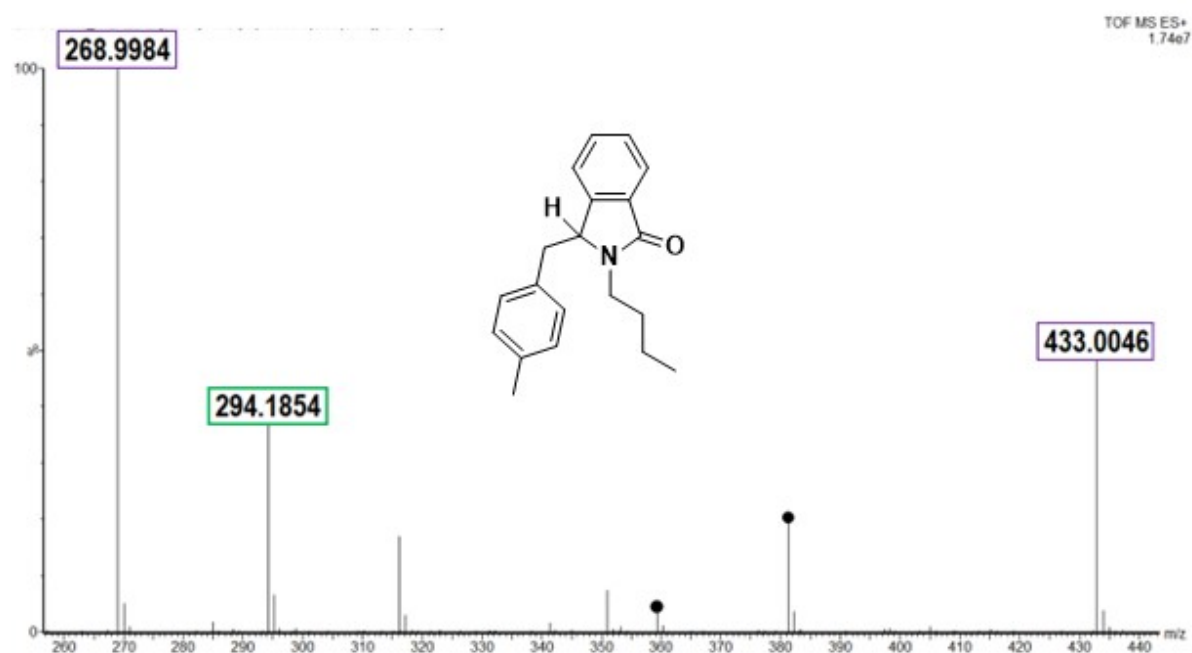

**Antiplasmodium activity of 3-Benzyl-2-butylisoindolin-1-one (1a)**

| Strain | [M (µg/mL)] | Repetition | Infected cell | Found cell | %parasitemia | Average of %parasitemia | % inhibition | IC <sub>50</sub> (µg/mL) | IC <sub>50</sub> (µM) |
|--------|-------------|------------|---------------|------------|--------------|-------------------------|--------------|--------------------------|-----------------------|
| 3D7    | 10          | 1          | 3             | 1144       | 0.262        | 0.177                   | 95.121       | 2.284                    | 8.18                  |
|        |             | 2          | 1             | 1045       | 0.096        |                         |              |                          |                       |
|        |             | 3          | 2             | 1156       | 0.173        |                         |              |                          |                       |
|        | 5           | 1          | 14            | 1098       | 1.275        | 1.222                   | 66.324       |                          |                       |
|        |             | 2          | 11            | 1058       | 1.040        |                         |              |                          |                       |
|        |             | 3          | 14            | 1037       | 1.350        |                         |              |                          |                       |
|        | 2.5         | 1          | 18            | 1061       | 1.697        | 2.138                   | 41.059       |                          |                       |
|        |             | 2          | 18            | 1098       | 1.639        |                         |              |                          |                       |
|        |             | 3          | 33            | 1072       | 3.078        |                         |              |                          |                       |
|        | 1.25        | 1          | 17            | 1039       | 1.636        | 2.541                   | 29.940       |                          |                       |
|        |             | 2          | 33            | 1076       | 3.067        |                         |              |                          |                       |
|        |             | 3          | 30            | 1027       | 2.921        |                         |              |                          |                       |
| 0.625  | 1           | 32         | 1018          | 3.143      | 2.691        | 25.804                  |              |                          |                       |
|        | 2           | 29         | 1014          | 2.860      |              |                         |              |                          |                       |
|        | 3           | 21         | 1014          | 2.071      |              |                         |              |                          |                       |
| FCR3   | 10          | 1          | 2             | 1090       | 0.18         | 0.12                    | 98.839       | 1.670                    | 5.98                  |
|        |             | 2          | 0             | 1045       | 0.00         |                         |              |                          |                       |
|        |             | 3          | 2             | 1048       | 0.19         |                         |              |                          |                       |
|        | 5           | 1          | 16            | 1044       | 1.53         | 1.90                    | 82.294       |                          |                       |
|        |             | 2          | 22            | 1054       | 2.09         |                         |              |                          |                       |
|        |             | 3          | 22            | 1054       | 2.09         |                         |              |                          |                       |
|        | 2.5         | 1          | 39            | 1038       | 3.76         | 4.41                    | 58.937       |                          |                       |
|        |             | 2          | 44            | 1001       | 4.40         |                         |              |                          |                       |
|        |             | 3          | 52            | 1023       | 5.08         |                         |              |                          |                       |
|        | 1.25        | 1          | 63            | 1080       | 5.83         | 6.63                    | 38.301       |                          |                       |
|        |             | 2          | 71            | 1059       | 6.70         |                         |              |                          |                       |
|        |             | 3          | 76            | 1034       | 7.35         |                         |              |                          |                       |
|        | 0.625       | 1          | 101           | 1105       | 9.14         | 8.42                    | 21.637       |                          |                       |
|        |             | 2          | 76            | 1045       | 7.27         |                         |              |                          |                       |
|        |             | 3          | 92            | 1040       | 8.85         |                         |              |                          |                       |



**Antiplasmodium activity of 3-Benzyl-2-phenethylisoindolin-1-one (1b)**

| Strain | [M (µg/mL)] | Repetition | Infected cell | Found cell | %parasitemia | Average of %parasitemia | % inhibition | IC <sub>50</sub> (µg/mL) | IC <sub>50</sub> (µM) |
|--------|-------------|------------|---------------|------------|--------------|-------------------------|--------------|--------------------------|-----------------------|
| 3D7    | 10          | 1          | 70            | 1005       | 6.97         | 5.94                    | 51.772       | 10.665                   | 32.60                 |
|        |             | 2          | 66            | 1061       | 6.22         |                         |              |                          |                       |
|        |             | 3          | 50            | 1081       | 4.63         |                         |              |                          |                       |
|        | 5           | 1          | 71            | 1053       | 6.74         | 7.91                    | 35.771       |                          |                       |
|        |             | 2          | 93            | 1000       | 9.30         |                         |              |                          |                       |
|        |             | 3          | 80            | 1042       | 7.68         |                         |              |                          |                       |
|        | 2.5         | 1          | 121           | 1219       | 9.93         | 9.74                    | 20.841       |                          |                       |
|        |             | 2          | 94            | 1104       | 8.51         |                         |              |                          |                       |
|        |             | 3          | 117           | 1084       | 10.79        |                         |              |                          |                       |
|        | 1.25        | 1          | 105           | 1083       | 9.70         | 9.54                    | 22.478       |                          |                       |
|        |             | 2          | 103           | 1091       | 9.44         |                         |              |                          |                       |
|        |             | 3          | 103           | 1085       | 9.49         |                         |              |                          |                       |
| 0.625  | 1           | 113        | 1091          | 10.36      | 10.99        | 10.753                  |              |                          |                       |
|        | 2           | 129        | 1107          | 11.65      |              |                         |              |                          |                       |
|        | 3           | 120        | 1096          | 10.95      |              |                         |              |                          |                       |
| FCR3   | 10          | 1          | 73            | 1056       | 6.91         | 6.78                    | 50.162       | 8.802                    | 26.90                 |
|        |             | 2          | 77            | 1076       | 7.16         |                         |              |                          |                       |
|        |             | 3          | 71            | 1131       | 6.28         |                         |              |                          |                       |
|        | 5           | 1          | 80            | 1190       | 6.72         | 7.30                    | 46.325       |                          |                       |
|        |             | 2          | 89            | 1140       | 7.81         |                         |              |                          |                       |
|        |             | 3          | 79            | 1070       | 7.38         |                         |              |                          |                       |
|        | 2.5         | 1          | 93            | 1132       | 8.22         | 8.33                    | 38.770       |                          |                       |
|        |             | 2          | 95            | 1170       | 8.12         |                         |              |                          |                       |
|        |             | 3          | 90            | 1039       | 8.66         |                         |              |                          |                       |
|        | 1.25        | 1          | 109           | 1093       | 9.97         | 9.58                    | 29.609       |                          |                       |
|        |             | 2          | 99            | 1020       | 9.71         |                         |              |                          |                       |
|        |             | 3          | 103           | 1137       | 9.06         |                         |              |                          |                       |
|        | 0.625       | 1          | 101           | 1143       | 8.84         | 10.08                   | 25.910       |                          |                       |
|        |             | 2          | 111           | 1114       | 9.96         |                         |              |                          |                       |
|        |             | 3          | 125           | 1092       | 11.45        |                         |              |                          |                       |

**Antiplasmodium activity of 2,3-Dibenzylisoindolin-1-one (1c)**

| Strain | [M (µg/mL)] | Repetition | Infected cell | Found cell | %parasitemia | Average of %parasitemia | % inhibition | IC <sub>50</sub> (µg/mL) | IC <sub>50</sub> (µM) |
|--------|-------------|------------|---------------|------------|--------------|-------------------------|--------------|--------------------------|-----------------------|
| 3D7    | 10          | 1          | 14            | 1114       | 1.26         | 1.148                   | 68.342       | 4.979                    | 15.90                 |
|        |             | 2          | 7             | 1077       | 0.65         |                         |              |                          |                       |
|        |             | 3          | 16            | 1040       | 1.54         |                         |              |                          |                       |
|        | 5           | 1          | 17            | 1028       | 1.65         | 1.927                   | 46.889       |                          |                       |
|        |             | 2          | 23            | 1107       | 2.08         |                         |              |                          |                       |
|        |             | 3          | 22            | 1074       | 2.05         |                         |              |                          |                       |
|        | 2.5         | 1          | 20            | 1020       | 1.96         | 2.203                   | 39.275       |                          |                       |
|        |             | 2          | 28            | 1071       | 2.61         |                         |              |                          |                       |
|        |             | 3          | 22            | 1082       | 2.03         |                         |              |                          |                       |
|        | 1.25        | 1          | 38            | 1058       | 3.59         | 3.201                   | 11.745       |                          |                       |
|        |             | 2          | 30            | 1126       | 2.66         |                         |              |                          |                       |
|        |             | 3          | 37            | 1105       | 3.35         |                         |              |                          |                       |
|        | 0.625       | 1          | 36            | 1020       | 3.53         | 3.206                   | 11.607       |                          |                       |
|        |             | 2          | 27            | 1054       | 2.56         |                         |              |                          |                       |
|        |             | 3          | 38            | 1077       | 3.53         |                         |              |                          |                       |
| FCR3   | 10          | 1          | 48            | 1056       | 4.55         | 4.71                    | 56.207       | 8.621                    | 27.53                 |
|        |             | 2          | 50            | 1109       | 4.51         |                         |              |                          |                       |
|        |             | 3          | 53            | 1047       | 5.06         |                         |              |                          |                       |
|        | 5           | 1          | 62            | 1035       | 5.99         | 6.78                    | 36.869       |                          |                       |
|        |             | 2          | 73            | 1095       | 6.67         |                         |              |                          |                       |
|        |             | 3          | 85            | 1105       | 7.69         |                         |              |                          |                       |
|        | 2.5         | 1          | 92            | 1037       | 8.87         | 7.78                    | 27.568       |                          |                       |
|        |             | 2          | 95            | 1065       | 8.92         |                         |              |                          |                       |
|        |             | 3          | 60            | 1080       | 5.56         |                         |              |                          |                       |
|        | 1.25        | 1          | 104           | 1052       | 9.89         | 8.64                    | 19.612       |                          |                       |
|        |             | 2          | 80            | 1041       | 7.68         |                         |              |                          |                       |
|        |             | 3          | 90            | 1079       | 8.34         |                         |              |                          |                       |
|        | 0.625       | 1          | 103           | 1109       | 9.29         | 9.26                    | 13.819       |                          |                       |
|        |             | 2          | 106           | 1134       | 9.35         |                         |              |                          |                       |
|        |             | 3          | 94            | 1028       | 9.14         |                         |              |                          |                       |

**Antiplasmodium activity of 3-Benzyl-2-(4-chlorobenzyl)isoindolin-1-one (1d)**

| Strain | [M (µg/mL)] | Repetition | Infected cell | Found cell | %parasitemia | Average of %parasitemia | % inhibition | IC <sub>50</sub> (µg/mL) | IC <sub>50</sub> (µM) |
|--------|-------------|------------|---------------|------------|--------------|-------------------------|--------------|--------------------------|-----------------------|
| 3D7    | 10          | 1          | 17            | 1041       | 1.63         | 1.526                   | 57.931       | 5.516                    | 15.89                 |
|        |             | 2          | 19            | 1073       | 1.77         |                         |              |                          |                       |
|        |             | 3          | 13            | 1107       | 1.17         |                         |              |                          |                       |
|        | 5           | 1          | 21            | 1006       | 2.09         | 1.985                   | 45.285       |                          |                       |
|        |             | 2          | 18            | 1050       | 1.71         |                         |              |                          |                       |
|        |             | 3          | 22            | 1022       | 2.15         |                         |              |                          |                       |
|        | 2.5         | 1          | 21            | 1061       | 1.98         | 2.087                   | 42.465       |                          |                       |
|        |             | 2          | 18            | 1079       | 1.67         |                         |              |                          |                       |
|        |             | 3          | 27            | 1033       | 2.61         |                         |              |                          |                       |
|        | 1.25        | 1          | 25            | 1100       | 2.27         | 2.262                   | 37.645       |                          |                       |
|        |             | 2          | 18            | 1026       | 1.75         |                         |              |                          |                       |
|        |             | 3          | 28            | 1015       | 2.76         |                         |              |                          |                       |
| 0.625  | 1           | 30         | 1109          | 2.71       | 2.636        | 27.324                  |              |                          |                       |
|        | 2           | 25         | 1024          | 2.44       |              |                         |              |                          |                       |
|        | 3           | 30         | 1086          | 2.76       |              |                         |              |                          |                       |
| FCR3   | 10          | 1          | 3             | 1070       | 0.28         | 0.16                    | 98.536       | 2.598                    | 7.48                  |
|        |             | 2          | 0             | 1088       | 0.00         |                         |              |                          |                       |
|        |             | 3          | 2             | 1045       | 0.19         |                         |              |                          |                       |
|        | 5           | 1          | 44            | 1041       | 4.23         | 3.94                    | 63.368       |                          |                       |
|        |             | 2          | 31            | 1096       | 2.83         |                         |              |                          |                       |
|        |             | 3          | 48            | 1010       | 4.75         |                         |              |                          |                       |
|        | 2.5         | 1          | 63            | 1022       | 6.16         | 5.97                    | 44.456       |                          |                       |
|        |             | 2          | 62            | 1013       | 6.12         |                         |              |                          |                       |
|        |             | 3          | 59            | 1050       | 5.62         |                         |              |                          |                       |
|        | 1.25        | 1          | 101           | 1082       | 9.33         | 8.76                    | 18.507       |                          |                       |
|        |             | 2          | 90            | 1113       | 8.09         |                         |              |                          |                       |
|        |             | 3          | 99            | 1119       | 8.85         |                         |              |                          |                       |
|        | 0.625       | 1          | 103           | 1106       | 9.31         | 8.89                    | 17.237       |                          |                       |
|        |             | 2          | 106           | 1050       | 10.10        |                         |              |                          |                       |
|        |             | 3          | 78            | 1073       | 7.27         |                         |              |                          |                       |

**Antiplasmodium activity of 3-Benzyl-2-(4-fluorobenzyl)isoindolin-1-one (1e)**

| Strain | [M (µg/mL)] | Repetition | Infected cell | Found cell | %parasitemia | Average of %parasitemia | % inhibition | IC <sub>50</sub> (µg/mL) | IC <sub>50</sub> (µM) |
|--------|-------------|------------|---------------|------------|--------------|-------------------------|--------------|--------------------------|-----------------------|
| 3D7    | 10          | 1          | 8             | 1046       | 0.76         | 0.852                   | 76.507       | 2.891                    | 8.73                  |
|        |             | 2          | 11            | 1091       | 1.01         |                         |              |                          |                       |
|        |             | 3          | 8             | 1021       | 0.78         |                         |              |                          |                       |
|        | 5           | 1          | 14            | 1067       | 1.31         | 1.454                   | 59.925       |                          |                       |
|        |             | 2          | 15            | 1022       | 1.47         |                         |              |                          |                       |
|        |             | 3          | 17            | 1075       | 1.58         |                         |              |                          |                       |
|        | 2.5         | 1          | 21            | 1077       | 1.95         | 1.746                   | 51.858       |                          |                       |
|        |             | 2          | 18            | 1115       | 1.61         |                         |              |                          |                       |
|        |             | 3          | 17            | 1015       | 1.67         |                         |              |                          |                       |
|        | 1.25        | 1          | 22            | 1101       | 2.00         | 2.411                   | 33.543       |                          |                       |
|        |             | 2          | 31            | 1092       | 2.84         |                         |              |                          |                       |
|        |             | 3          | 24            | 1002       | 2.40         |                         |              |                          |                       |
| 0.625  | 1           | 30         | 1018          | 2.95       | 3.131        | 13.694                  |              |                          |                       |
|        | 2           | 34         | 1041          | 3.27       |              |                         |              |                          |                       |
|        | 3           | 33         | 1038          | 3.18       |              |                         |              |                          |                       |
| FCR3   | 10          | 1          | 16            | 1006       | 1.59         | 2.04                    | 80.977       | 3.459                    | 10.45                 |
|        |             | 2          | 15            | 1017       | 1.47         |                         |              |                          |                       |
|        |             | 3          | 31            | 1011       | 3.07         |                         |              |                          |                       |
|        | 5           | 1          | 67            | 1098       | 6.10         | 5.35                    | 50.229       |                          |                       |
|        |             | 2          | 50            | 1011       | 4.95         |                         |              |                          |                       |
|        |             | 3          | 52            | 1041       | 5.00         |                         |              |                          |                       |
|        | 2.5         | 1          | 75            | 1038       | 7.23         | 6.31                    | 41.253       |                          |                       |
|        |             | 2          | 62            | 1020       | 6.08         |                         |              |                          |                       |
|        |             | 3          | 61            | 1083       | 5.63         |                         |              |                          |                       |
|        | 1.25        | 1          | 99            | 1083       | 9.14         | 8.18                    | 23.859       |                          |                       |
|        |             | 2          | 90            | 1068       | 8.43         |                         |              |                          |                       |
|        |             | 3          | 80            | 1147       | 6.97         |                         |              |                          |                       |
|        | 0.625       | 1          | 101           | 1066       | 9.47         | 8.57                    | 20.213       |                          |                       |
|        |             | 2          | 86            | 1099       | 7.83         |                         |              |                          |                       |
|        |             | 3          | 91            | 1081       | 8.42         |                         |              |                          |                       |

**Antiplasmodium activity of 3-Benzyl-2-(4-(trifluoromethyl)benzyl)isoindolin-1-one (1f)**

| Strain | [M (µg/mL)] | Repetition | Infected cell | Found cell | %parasitemia | Average of %parasitemia | % inhibition | IC <sub>50</sub> (µg/mL) | IC <sub>50</sub> (µM) |
|--------|-------------|------------|---------------|------------|--------------|-------------------------|--------------|--------------------------|-----------------------|
| 3D7    | 10          | 1          | 3             | 1078       | 0.28         | 1.29                    | 87.417       | 5.278                    | 13.85                 |
|        |             | 2          | 13            | 1033       | 1.26         |                         |              |                          |                       |
|        |             | 3          | 31            | 1325       | 2.34         |                         |              |                          |                       |
|        | 5           | 1          | 73            | 1023       | 7.14         | 7.55                    | 26.431       |                          |                       |
|        |             | 2          | 90            | 1110       | 8.11         |                         |              |                          |                       |
|        |             | 3          | 86            | 1159       | 7.42         |                         |              |                          |                       |
|        | 2.5         | 1          | 91            | 1069       | 8.51         | 8.21                    | 20.003       |                          |                       |
|        |             | 2          | 92            | 1092       | 8.42         |                         |              |                          |                       |
|        |             | 3          | 81            | 1051       | 7.71         |                         |              |                          |                       |
|        | 1.25        | 1          | 98            | 1046       | 9.37         | 8.30                    | 19.130       |                          |                       |
|        |             | 2          | 68            | 1022       | 6.65         |                         |              |                          |                       |
|        |             | 3          | 101           | 1136       | 8.89         |                         |              |                          |                       |
|        | 0.625       | 1          | 105           | 1069       | 9.82         | 9.15                    | 10.903       |                          |                       |
|        |             | 2          | 100           | 1092       | 9.16         |                         |              |                          |                       |
|        |             | 3          | 89            | 1051       | 8.47         |                         |              |                          |                       |
| FCR3   | 10          | 1          | 20            | 1050       | 1.90         | 2.66                    | 76.662       | 1.603                    | 4.21                  |
|        |             | 2          | 27            | 1059       | 2.55         |                         |              |                          |                       |
|        |             | 3          | 37            | 1047       | 3.53         |                         |              |                          |                       |
|        | 5           | 1          | 49            | 1007       | 4.87         | 4.78                    | 58.135       |                          |                       |
|        |             | 2          | 62            | 1070       | 5.79         |                         |              |                          |                       |
|        |             | 3          | 40            | 1090       | 3.67         |                         |              |                          |                       |
|        | 2.5         | 1          | 64            | 1033       | 6.20         | 5.78                    | 49.351       |                          |                       |
|        |             | 2          | 54            | 1016       | 5.31         |                         |              |                          |                       |
|        |             | 3          | 61            | 1047       | 5.83         |                         |              |                          |                       |
|        | 1.25        | 1          | 63            | 1016       | 6.20         | 5.81                    | 49.041       |                          |                       |
|        |             | 2          | 62            | 1037       | 5.98         |                         |              |                          |                       |
|        |             | 3          | 56            | 1064       | 5.26         |                         |              |                          |                       |
|        | 0.625       | 1          | 73            | 1046       | 6.98         | 6.65                    | 41.744       |                          |                       |
|        |             | 2          | 77            | 1032       | 7.46         |                         |              |                          |                       |
|        |             | 3          | 61            | 1109       | 5.50         |                         |              |                          |                       |

**Antiplasmodium activity of 3-Benzyl-2-(4-methylbenzyl)isoindolin-1-one (1g)**

| Strain | [M (µg/mL)] | Repetition | Infected cell | Found cell | %parasitemia | Average of %parasitemia | % inhibition | IC <sub>50</sub> (µg/mL) | IC <sub>50</sub> (µM) |
|--------|-------------|------------|---------------|------------|--------------|-------------------------|--------------|--------------------------|-----------------------|
| 3D7    | 10          | 1          | 9             | 1063       | 0.85         | 0.747                   | 79.419       | 2.699                    | 8.25                  |
|        |             | 2          | 9             | 1074       | 0.84         |                         |              |                          |                       |
|        |             | 3          | 6             | 1081       | 0.56         |                         |              |                          |                       |
|        | 5           | 1          | 21            | 1011       | 2.08         | 1.643                   | 54.707       |                          |                       |
|        |             | 2          | 10            | 1000       | 1.00         |                         |              |                          |                       |
|        |             | 3          | 19            | 1026       | 1.85         |                         |              |                          |                       |
|        | 2.5         | 1          | 18            | 1036       | 1.74         | 1.979                   | 45.454       |                          |                       |
|        |             | 2          | 25            | 1025       | 2.44         |                         |              |                          |                       |
|        |             | 3          | 18            | 1023       | 1.76         |                         |              |                          |                       |
|        | 1.25        | 1          | 28            | 1022       | 2.74         | 2.230                   | 38.538       |                          |                       |
|        |             | 2          | 25            | 2063       | 1.21         |                         |              |                          |                       |
|        |             | 3          | 28            | 1023       | 2.74         |                         |              |                          |                       |
| 0.625  | 1           | 28         | 1050          | 2.67       | 2.724        | 24.917                  |              |                          |                       |
|        | 2           | 29         | 1071          | 2.71       |              |                         |              |                          |                       |
|        | 3           | 29         | 1037          | 2.80       |              |                         |              |                          |                       |
| FCR3   | 10          | 1          | 1             | 1084       | 0.09         | 0.18                    | 98.314       | 2.214                    | 6.77                  |
|        |             | 2          | 4             | 1120       | 0.36         |                         |              |                          |                       |
|        |             | 3          | 1             | 1063       | 0.09         |                         |              |                          |                       |
|        | 5           | 1          | 21            | 1018       | 2.06         | 1.64                    | 84.737       |                          |                       |
|        |             | 2          | 21            | 1087       | 1.93         |                         |              |                          |                       |
|        |             | 3          | 10            | 1081       | 0.93         |                         |              |                          |                       |
|        | 2.5         | 1          | 63            | 1015       | 6.21         | 6.94                    | 35.435       |                          |                       |
|        |             | 2          | 79            | 1109       | 7.12         |                         |              |                          |                       |
|        |             | 3          | 79            | 1056       | 7.48         |                         |              |                          |                       |
|        | 1.25        | 1          | 78            | 1028       | 7.59         | 7.49                    | 30.290       |                          |                       |
|        |             | 2          | 83            | 1112       | 7.46         |                         |              |                          |                       |
|        |             | 3          | 75            | 1011       | 7.42         |                         |              |                          |                       |
|        | 0.625       | 1          | 105           | 1017       | 10.32        | 9.19                    | 14.512       |                          |                       |
|        |             | 2          | 89            | 1091       | 8.16         |                         |              |                          |                       |
|        |             | 3          | 96            | 1058       | 9.07         |                         |              |                          |                       |

**Antiplasmodium activity of 3-Benzyl-2-(4-methoxybenzyl)isoindolin-1-one (1h)**

| Strain | [M (µg/mL)] | Repetition | Infected cell | Found cell | %parasitemia | Average of %parasitemia | % inhibition | IC <sub>50</sub> (µg/mL) | IC <sub>50</sub> (µM) |
|--------|-------------|------------|---------------|------------|--------------|-------------------------|--------------|--------------------------|-----------------------|
| 3D7    | 10          | 1          | 7             | 1209       | 0.58         | 0.821                   | 92.008       | 4.213                    | 12.28                 |
|        |             | 2          | 7             | 1003       | 0.70         |                         |              |                          |                       |
|        |             | 3          | 13            | 1097       | 1.19         |                         |              |                          |                       |
|        | 5           | 1          | 81            | 1031       | 7.86         | 6.606                   | 35.670       |                          |                       |
|        |             | 2          | 72            | 1065       | 6.76         |                         |              |                          |                       |
|        |             | 3          | 53            | 1019       | 5.20         |                         |              |                          |                       |
|        | 2.5         | 1          | 74            | 1014       | 7.30         | 7.481                   | 27.146       |                          |                       |
|        |             | 2          | 94            | 1129       | 8.33         |                         |              |                          |                       |
|        |             | 3          | 74            | 1085       | 6.82         |                         |              |                          |                       |
|        | 1.25        | 1          | 101           | 1046       | 9.66         | 8.34                    | 18.777       |                          |                       |
|        |             | 2          | 93            | 1046       | 8.89         |                         |              |                          |                       |
|        |             | 3          | 70            | 1081       | 6.48         |                         |              |                          |                       |
|        | 0.625       | 1          | 112           | 1005       | 11.14        | 9.06                    | 11.735       |                          |                       |
|        |             | 2          | 91            | 1076       | 8.46         |                         |              |                          |                       |
|        |             | 3          | 80            | 1054       | 7.59         |                         |              |                          |                       |
| FCR3   | 10          | 1          | 34            | 1114       | 3.05         | 3.69                    | 65.660       | 4.936                    | 14.38                 |
|        |             | 2          | 48            | 1064       | 4.51         |                         |              |                          |                       |
|        |             | 3          | 38            | 1084       | 3.51         |                         |              |                          |                       |
|        | 5           | 1          | 54            | 1004       | 5.38         | 5.39                    | 49.834       |                          |                       |
|        |             | 2          | 59            | 1112       | 5.31         |                         |              |                          |                       |
|        |             | 3          | 57            | 1039       | 5.49         |                         |              |                          |                       |
|        | 2.5         | 1          | 63            | 1048       | 6.01         | 6.64                    | 38.243       |                          |                       |
|        |             | 2          | 73            | 1073       | 6.80         |                         |              |                          |                       |
|        |             | 3          | 79            | 1114       | 7.09         |                         |              |                          |                       |
|        | 1.25        | 1          | 85            | 1060       | 8.02         | 8.94                    | 16.787       |                          |                       |
|        |             | 2          | 102           | 1004       | 10.16        |                         |              |                          |                       |
|        |             | 3          | 95            | 1099       | 8.64         |                         |              |                          |                       |
|        | 0.625       | 1          | 104           | 1060       | 9.81         | 9.37                    | 12.766       |                          |                       |
|        |             | 2          | 85            | 1048       | 8.11         |                         |              |                          |                       |
|        |             | 3          | 109           | 1069       | 10.20        |                         |              |                          |                       |

**Antiplasmodium activity of 3-Benzyl-2-(3-methoxybenzyl)isoindolin-1-one (1i)**

| Strain | [M (µg/mL)] | Repetition | Infected cell | Found cell | %parasitemia | Average of %parasitemia | % inhibition | IC <sub>50</sub> (µg/mL) | IC <sub>50</sub> (µM) |
|--------|-------------|------------|---------------|------------|--------------|-------------------------|--------------|--------------------------|-----------------------|
| 3D7    | 10          | 1          | 59            | 1053       | 5.60         | 5.78                    | 53.085       | 9.465                    | 27.58                 |
|        |             | 2          | 57            | 1000       | 5.70         |                         |              |                          |                       |
|        |             | 3          | 63            | 1046       | 6.02         |                         |              |                          |                       |
|        | 5           | 1          | 83            | 1020       | 8.14         | 8.34                    | 32.277       |                          |                       |
|        |             | 2          | 83            | 1028       | 8.07         |                         |              |                          |                       |
|        |             | 3          | 96            | 1091       | 8.80         |                         |              |                          |                       |
|        | 2.5         | 1          | 101           | 1073       | 9.41         | 10.15                   | 17.524       |                          |                       |
|        |             | 2          | 112           | 1074       | 10.43        |                         |              |                          |                       |
|        |             | 3          | 110           | 1036       | 10.62        |                         |              |                          |                       |
|        | 1.25        | 1          | 116           | 1000       | 11.60        | 11.47                   | 6.831        |                          |                       |
|        |             | 2          | 110           | 1015       | 10.84        |                         |              |                          |                       |
|        |             | 3          | 130           | 1086       | 11.97        |                         |              |                          |                       |
|        | 0.625       | 1          | 124           | 1024       | 12.11        | 11.75                   | 4.571        |                          |                       |
|        |             | 2          | 118           | 1037       | 11.38        |                         |              |                          |                       |
|        |             | 3          | 130           | 1106       | 11.75        |                         |              |                          |                       |
| FCR3   | 10          | 1          | 70            | 1081       | 6.48         | 6.55                    | 51.879       | 9.686                    | 28.23                 |
|        |             | 2          | 61            | 1041       | 5.86         |                         |              |                          |                       |
|        |             | 3          | 81            | 1108       | 7.31         |                         |              |                          |                       |
|        | 5           | 1          | 88            | 1085       | 8.11         | 8.20                    | 39.722       |                          |                       |
|        |             | 2          | 93            | 1027       | 9.06         |                         |              |                          |                       |
|        |             | 3          | 78            | 1048       | 7.44         |                         |              |                          |                       |
|        | 2.5         | 1          | 112           | 1061       | 10.56        | 10.10                   | 25.789       |                          |                       |
|        |             | 2          | 108           | 1053       | 10.26        |                         |              |                          |                       |
|        |             | 3          | 114           | 1202       | 9.48         |                         |              |                          |                       |
|        | 1.25        | 1          | 130           | 1184       | 10.98        | 10.24                   | 24.750       |                          |                       |
|        |             | 2          | 109           | 1098       | 9.93         |                         |              |                          |                       |
|        |             | 3          | 111           | 1131       | 9.81         |                         |              |                          |                       |
|        | 0.625       | 1          | 128           | 1064       | 12.03        | 11.71                   | 13.953       |                          |                       |
|        |             | 2          | 129           | 1137       | 11.35        |                         |              |                          |                       |
|        |             | 3          | 120           | 1021       | 11.75        |                         |              |                          |                       |



**Antiplasmodium activity of 3-Benzyl-2-(2-methoxybenzyl)isoindolin-1-one (1j)**

| Strain | [M (µg/mL)] | Repetition | Infected cell | Found cell | %parasitemia | Average of %parasitemia | % inhibition | IC <sub>50</sub> (µg/mL) | IC <sub>50</sub> (µM) |
|--------|-------------|------------|---------------|------------|--------------|-------------------------|--------------|--------------------------|-----------------------|
| 3D7    | 10          | 1          | 70            | 1041       | 6.72         | 6.01                    | 51.190       | 11.941                   | 34.80                 |
|        |             | 2          | 66            | 1083       | 6.09         |                         |              |                          |                       |
|        |             | 3          | 54            | 1037       | 5.21         |                         |              |                          |                       |
|        | 5           | 1          | 93            | 1019       | 9.13         | 8.95                    | 27.296       |                          |                       |
|        |             | 2          | 88            | 1007       | 8.74         |                         |              |                          |                       |
|        |             | 3          | 100           | 1113       | 8.98         |                         |              |                          |                       |
|        | 2.5         | 1          | 103           | 1057       | 9.74         | 9.76                    | 20.716       |                          |                       |
|        |             | 2          | 96            | 1012       | 9.49         |                         |              |                          |                       |
|        |             | 3          | 102           | 1015       | 10.05        |                         |              |                          |                       |
|        | 1.25        | 1          | 123           | 1030       | 11.94        | 10.84                   | 11.977       |                          |                       |
|        |             | 2          | 105           | 1049       | 10.01        |                         |              |                          |                       |
|        |             | 3          | 112           | 1061       | 10.56        |                         |              |                          |                       |
| 0.625  | 1           | 123        | 1035          | 11.88      | 11.28        | 8.394                   |              |                          |                       |
|        | 2           | 110        | 1024          | 10.74      |              |                         |              |                          |                       |
|        | 3           | 120        | 1071          | 11.20      |              |                         |              |                          |                       |
| FCR3   | 10          | 1          | 80            | 1116       | 7.17         | 6.17                    | 54.681       | 10.421                   | 30.37                 |
|        |             | 2          | 66            | 1027       | 6.43         |                         |              |                          |                       |
|        |             | 3          | 50            | 1019       | 4.91         |                         |              |                          |                       |
|        | 5           | 1          | 100           | 1088       | 9.19         | 8.96                    | 34.133       |                          |                       |
|        |             | 2          | 96            | 1025       | 9.37         |                         |              |                          |                       |
|        |             | 3          | 94            | 1128       | 8.33         |                         |              |                          |                       |
|        | 2.5         | 1          | 103           | 1145       | 9.00         | 10.05                   | 26.184       |                          |                       |
|        |             | 2          | 110           | 1066       | 10.32        |                         |              |                          |                       |
|        |             | 3          | 116           | 1072       | 10.82        |                         |              |                          |                       |
|        | 1.25        | 1          | 123           | 1142       | 10.77        | 10.74                   | 21.070       |                          |                       |
|        |             | 2          | 117           | 1067       | 10.97        |                         |              |                          |                       |
|        |             | 3          | 114           | 1087       | 10.49        |                         |              |                          |                       |
| 0.625  | 1           | 130        | 1088          | 11.95      | 11.35        | 16.630                  |              |                          |                       |
|        | 2           | 117        | 1039          | 11.26      |              |                         |              |                          |                       |
|        | 3           | 110        | 1016          | 10.83      |              |                         |              |                          |                       |

**Antiplasmodium activity of 3-Benzyl-2-(furan-2-ylmethyl)isoindolin-1-one (1k)**

| Strain | [M (µg/mL)] | Repetition | Infected cell | Found cell | %parasitemia | Average of %parasitemia | % inhibition | IC <sub>50</sub> (µg/mL) | IC <sub>50</sub> (µM) |
|--------|-------------|------------|---------------|------------|--------------|-------------------------|--------------|--------------------------|-----------------------|
| 3D7    | 10          | 1          | 4             | 1106       | 0.36         | 0.38                    | 96.284       | 3.964                    | 13.08                 |
|        |             | 2          | 3             | 1043       | 0.29         |                         |              |                          |                       |
|        |             | 3          | 5             | 1009       | 0.50         |                         |              |                          |                       |
|        | 5           | 1          | 70            | 1081       | 6.48         | 6.98                    | 32.063       |                          |                       |
|        |             | 2          | 80            | 1037       | 7.71         |                         |              |                          |                       |
|        |             | 3          | 68            | 1009       | 6.74         |                         |              |                          |                       |
|        | 2.5         | 1          | 79            | 1096       | 7.21         | 7.35                    | 28.455       |                          |                       |
|        |             | 2          | 78            | 1049       | 7.44         |                         |              |                          |                       |
|        |             | 3          | 79            | 1068       | 7.40         |                         |              |                          |                       |
|        | 1.25        | 1          | 78            | 1121       | 6.96         | 7.73                    | 24.737       |                          |                       |
|        |             | 2          | 90            | 1110       | 8.11         |                         |              |                          |                       |
|        |             | 3          | 92            | 1133       | 8.12         |                         |              |                          |                       |
| 0.625  | 1           | 92         | 1038          | 8.86       | 9.19         | 10.528                  |              |                          |                       |
|        | 2           | 90         | 1008          | 8.93       |              |                         |              |                          |                       |
|        | 3           | 107        | 1095          | 9.77       |              |                         |              |                          |                       |
| FCR3   | 10          | 1          | 33            | 1026       | 3.22         | 3.46                    | 69.639       | 1.583                    | 5.22                  |
|        |             | 2          | 37            | 1071       | 3.45         |                         |              |                          |                       |
|        |             | 3          | 39            | 1048       | 3.72         |                         |              |                          |                       |
|        | 5           | 1          | 44            | 1027       | 4.28         | 4.63                    | 59.423       |                          |                       |
|        |             | 2          | 52            | 1065       | 4.88         |                         |              |                          |                       |
|        |             | 3          | 51            | 1080       | 4.72         |                         |              |                          |                       |
|        | 2.5         | 1          | 67            | 1097       | 6.11         | 5.37                    | 52.977       |                          |                       |
|        |             | 2          | 54            | 1128       | 4.79         |                         |              |                          |                       |
|        |             | 3          | 57            | 1096       | 5.20         |                         |              |                          |                       |
|        | 1.25        | 1          | 60            | 1104       | 5.43         | 5.70                    | 50.054       |                          |                       |
|        |             | 2          | 65            | 1061       | 6.13         |                         |              |                          |                       |
|        |             | 3          | 60            | 1084       | 5.54         |                         |              |                          |                       |
|        | 0.625       | 1          | 72            | 1072       | 6.72         | 6.82                    | 40.208       |                          |                       |
|        |             | 2          | 82            | 1043       | 7.86         |                         |              |                          |                       |
|        |             | 3          | 63            | 1070       | 5.89         |                         |              |                          |                       |

**Antiplasmodium activity of 3-Benzyl-2-(thiophen-2-ylmethyl)isoindolin-1-one (1l)**

| Strain | [M (µg/mL)] | Repetition | Infected cell | Found cell | %parasitemia | Average of %parasitemia | % inhibition | IC <sub>50</sub> (µg/mL) | IC <sub>50</sub> (µM) |
|--------|-------------|------------|---------------|------------|--------------|-------------------------|--------------|--------------------------|-----------------------|
| 3D7    | 10          | 1          | 2             | 1017       | 0.20         | 0.13                    | 98.721       | 3.034                    | 9.50                  |
|        |             | 2          | 2             | 1014       | 0.20         |                         |              |                          |                       |
|        |             | 3          | 0             | 1037       | 0.00         |                         |              |                          |                       |
|        | 5           | 1          | 67            | 1063       | 6.30         | 6.28                    | 38.816       |                          |                       |
|        |             | 2          | 50            | 1001       | 5.00         |                         |              |                          |                       |
|        |             | 3          | 78            | 1033       | 7.55         |                         |              |                          |                       |
|        | 2.5         | 1          | 72            | 1016       | 7.09         | 6.35                    | 38.165       |                          |                       |
|        |             | 2          | 62            | 1030       | 6.02         |                         |              |                          |                       |
|        |             | 3          | 63            | 1060       | 5.94         |                         |              |                          |                       |
|        | 1.25        | 1          | 63            | 1064       | 5.92         | 7.23                    | 29.593       |                          |                       |
|        |             | 2          | 75            | 1037       | 7.23         |                         |              |                          |                       |
|        |             | 3          | 91            | 1066       | 8.54         |                         |              |                          |                       |
|        | 0.625       | 1          | 88            | 1005       | 8.76         | 8.12                    | 20.929       |                          |                       |
|        |             | 2          | 80            | 1075       | 7.44         |                         |              |                          |                       |
|        |             | 3          | 83            | 1017       | 8.16         |                         |              |                          |                       |
| FCR3   | 10          | 1          | 40            | 1011       | 3.96         | 3.72                    | 67.405       | 1.976                    | 6.19                  |
|        |             | 2          | 45            | 1047       | 4.30         |                         |              |                          |                       |
|        |             | 3          | 31            | 1068       | 2.90         |                         |              |                          |                       |
|        | 5           | 1          | 57            | 1048       | 5.44         | 4.94                    | 56.673       |                          |                       |
|        |             | 2          | 51            | 1072       | 4.76         |                         |              |                          |                       |
|        |             | 3          | 50            | 1079       | 4.63         |                         |              |                          |                       |
|        | 2.5         | 1          | 57            | 1113       | 5.12         | 5.20                    | 54.447       |                          |                       |
|        |             | 2          | 59            | 1058       | 5.58         |                         |              |                          |                       |
|        |             | 3          | 51            | 1042       | 4.89         |                         |              |                          |                       |
|        | 1.25        | 1          | 60            | 1065       | 5.63         | 5.48                    | 52.010       |                          |                       |
|        |             | 2          | 50            | 1088       | 4.60         |                         |              |                          |                       |
|        |             | 3          | 66            | 1065       | 6.20         |                         |              |                          |                       |
|        | 0.625       | 1          | 81            | 1116       | 7.26         | 7.74                    | 32.150       |                          |                       |
|        |             | 2          | 87            | 1123       | 7.75         |                         |              |                          |                       |
|        |             | 3          | 90            | 1095       | 8.22         |                         |              |                          |                       |

**Antiplasmodium activity of 2-Butyl-3-(4-methylbenzyl)isoindolin-1-one (1m)**

| Strain | [M (µg/mL)] | Repetition | Infected cell | Found cell | %parasitemia | Average of %parasitemia | % inhibition | IC <sub>50</sub> (µg/mL) | IC <sub>50</sub> (µM) |
|--------|-------------|------------|---------------|------------|--------------|-------------------------|--------------|--------------------------|-----------------------|
| 3D7    | 10          | 1          | 47            | 1022       | 4.60         | 4.95                    | 51.750       | 9.955                    | 33.96                 |
|        |             | 2          | 43            | 1066       | 4.03         |                         |              |                          |                       |
|        |             | 3          | 64            | 1027       | 6.23         |                         |              |                          |                       |
|        | 5           | 1          | 71            | 1020       | 6.96         | 7.43                    | 27.653       |                          |                       |
|        |             | 2          | 79            | 1025       | 7.71         |                         |              |                          |                       |
|        |             | 3          | 89            | 1168       | 7.62         |                         |              |                          |                       |
|        | 2.5         | 1          | 106           | 1203       | 8.81         | 8.72                    | 15.084       |                          |                       |
|        |             | 2          | 109           | 1295       | 8.42         |                         |              |                          |                       |
|        |             | 3          | 102           | 1142       | 8.93         |                         |              |                          |                       |
|        | 1.25        | 1          | 94            | 1020       | 9.22         | 9.39                    | 8.561        |                          |                       |
|        |             | 2          | 94            | 1110       | 8.47         |                         |              |                          |                       |
|        |             | 3          | 108           | 1030       | 10.49        |                         |              |                          |                       |
| 0.625  | 1           | 102        | 1142          | 8.93       | 10.15        | 1.127                   |              |                          |                       |
|        | 2           | 118        | 1100          | 10.73      |              |                         |              |                          |                       |
|        | 3           | 116        | 1074          | 10.80      |              |                         |              |                          |                       |
| FCR3   | 10          | 1          | 28            | 1023       | 2.74         | 3.27                    | 71.306       | 2.730                    | 9.31                  |
|        |             | 2          | 33            | 1035       | 3.19         |                         |              |                          |                       |
|        |             | 3          | 39            | 1001       | 3.90         |                         |              |                          |                       |
|        | 5           | 1          | 56            | 1049       | 5.34         | 5.50                    | 51.805       |                          |                       |
|        |             | 2          | 68            | 1045       | 6.51         |                         |              |                          |                       |
|        |             | 3          | 48            | 1032       | 4.65         |                         |              |                          |                       |
|        | 2.5         | 1          | 60            | 1032       | 5.81         | 5.70                    | 50.060       |                          |                       |
|        |             | 2          | 66            | 1136       | 5.81         |                         |              |                          |                       |
|        |             | 3          | 57            | 1042       | 5.47         |                         |              |                          |                       |
|        | 1.25        | 1          | 72            | 1063       | 6.77         | 6.70                    | 41.249       |                          |                       |
|        |             | 2          | 75            | 1105       | 6.79         |                         |              |                          |                       |
|        |             | 3          | 67            | 1023       | 6.55         |                         |              |                          |                       |
|        | 0.625       | 1          | 74            | 1002       | 7.39         | 8.02                    | 29.696       |                          |                       |
|        |             | 2          | 85            | 1032       | 8.24         |                         |              |                          |                       |
|        |             | 3          | 90            | 1066       | 8.44         |                         |              |                          |                       |
